# Supplementary material for: Electron-donating arene-substituted pentacenedione derivatives: a study of structural, electronic, and electrochemical properties
Source: Royal Society of Chemistry journal article supplement (doi:10.1039/d3ra05173k), 2024-01-01
Supplement: d3ra05173k1.pdf [file d3ra05173k1.pdf]

*Supporting Information for*

**Electron-donating arene-substituted pentacenedione derivatives: a study of structural, electronic, and electrochemical properties**

Eyad A. Younes,<sup>\*a</sup> Yamen J. Hammad,<sup>a</sup> Fatemeh Salami,<sup>b</sup> Anas J. Rasras,<sup>c</sup> Raed A. Al-Qawasmeh<sup>d,e</sup> and Yuming Zhao<sup>b</sup>

<sup>a</sup>Department of Chemistry, Faculty of Science, The Hashemite University, P.O. Box 330127, Zarqa 13133, Jordan. E-mail: e.younes@hu.edu.jo; Tel: +962 (5) 3903333 ext. 4572

<sup>b</sup>Department of Chemistry, Memorial University of Newfoundland, St. John's, NL, Canada A1C 5S7. E-mail: yuming@mun.ca; Tel: +1 709 864 8747

<sup>c</sup>Department of Chemistry, Faculty of Science, Al-Balqa Applied University, PO Box 19117, Al-Salt, Jordan

<sup>d</sup>Pure and Applied Chemistry Research Group, College of Science, Department of Chemistry, University of Sharjah, PO Box 27272, Sharjah, United Arab Emirates

<sup>e</sup>Department of Chemistry, The University of Jordan, Amman 11942, Jordan

**Table of Content**

|                                                                               |      |
|-------------------------------------------------------------------------------|------|
| 1. NMR Spectra of Compounds <b>3a</b> and <b>5a-d</b>                         | S-2  |
| 2. UV-Vis Titrations of Compounds <b>2</b> and TPA <b>7</b> with TFA          | S-11 |
| 3. High-Resolution Mass Spectra for Compounds <b>3a</b> and <b>5a-d</b>       | S-12 |
| 4. Detailed Results of DFT Calculation of compound <b>5a</b>                  | S-21 |
| 5. Crystallographic Data and Detailed Refinements for <b>3a</b> and <b>5c</b> | S-25 |

## 1. NMR Spectra of Compounds 3a and 5a-d

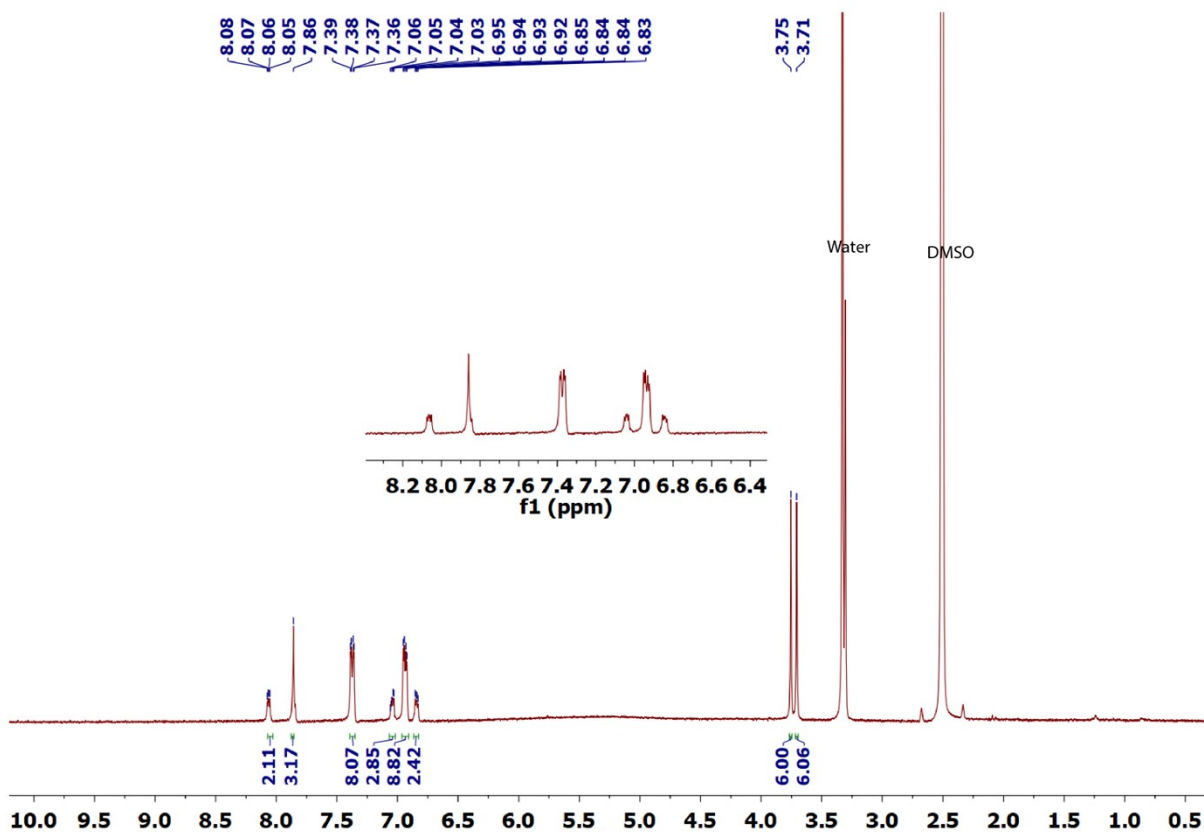

Fig. S-1  $^1\text{H}$  NMR (400 MHz,  $\text{CDCl}_3$ ) spectrum of compound 3a.

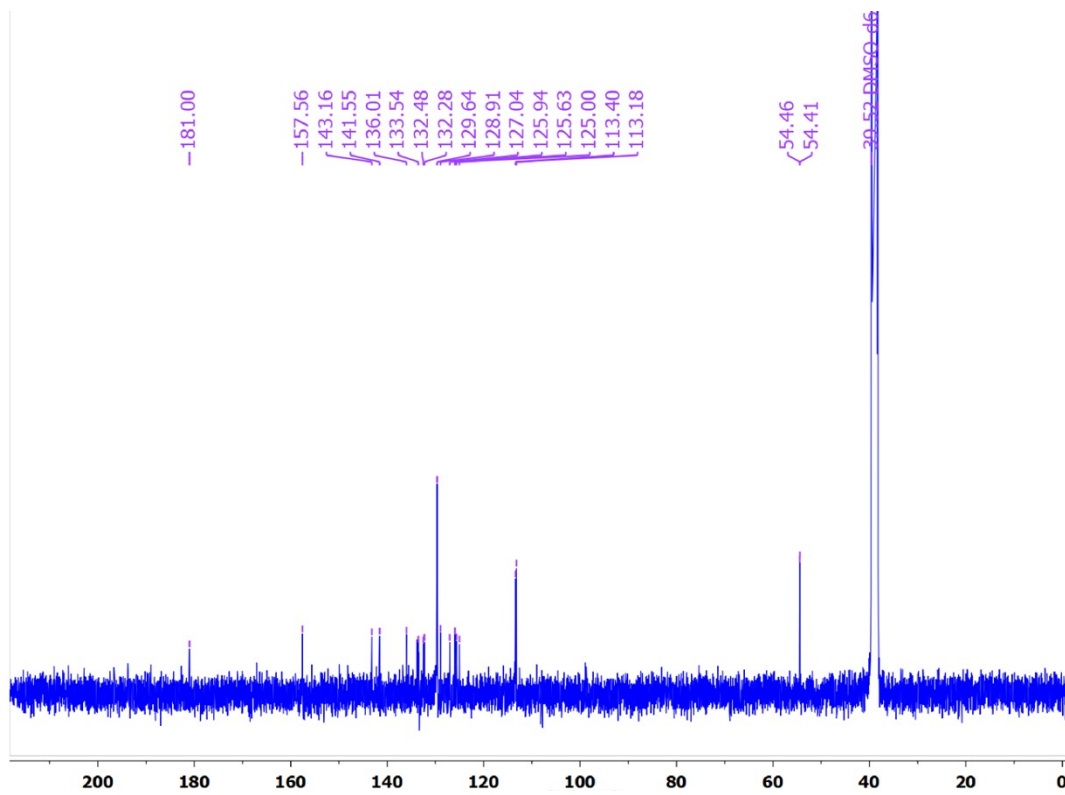

Fig. S-2  $^{13}\text{C}$  NMR (100 MHz,  $\text{CDCl}_3$ ) spectrum of compound **3a**.

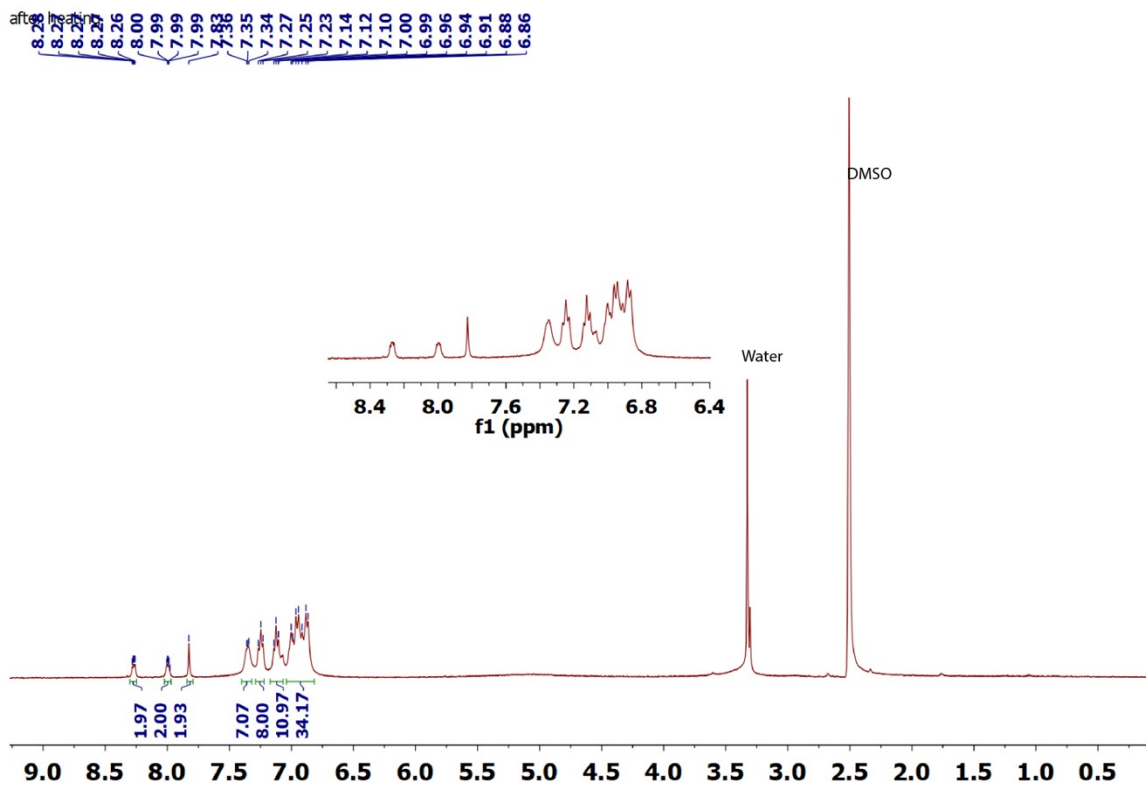

Fig. S-3  $^1\text{H}$  NMR (400 MHz,  $\text{CDCl}_3$ ) spectrum of compound **5a**.

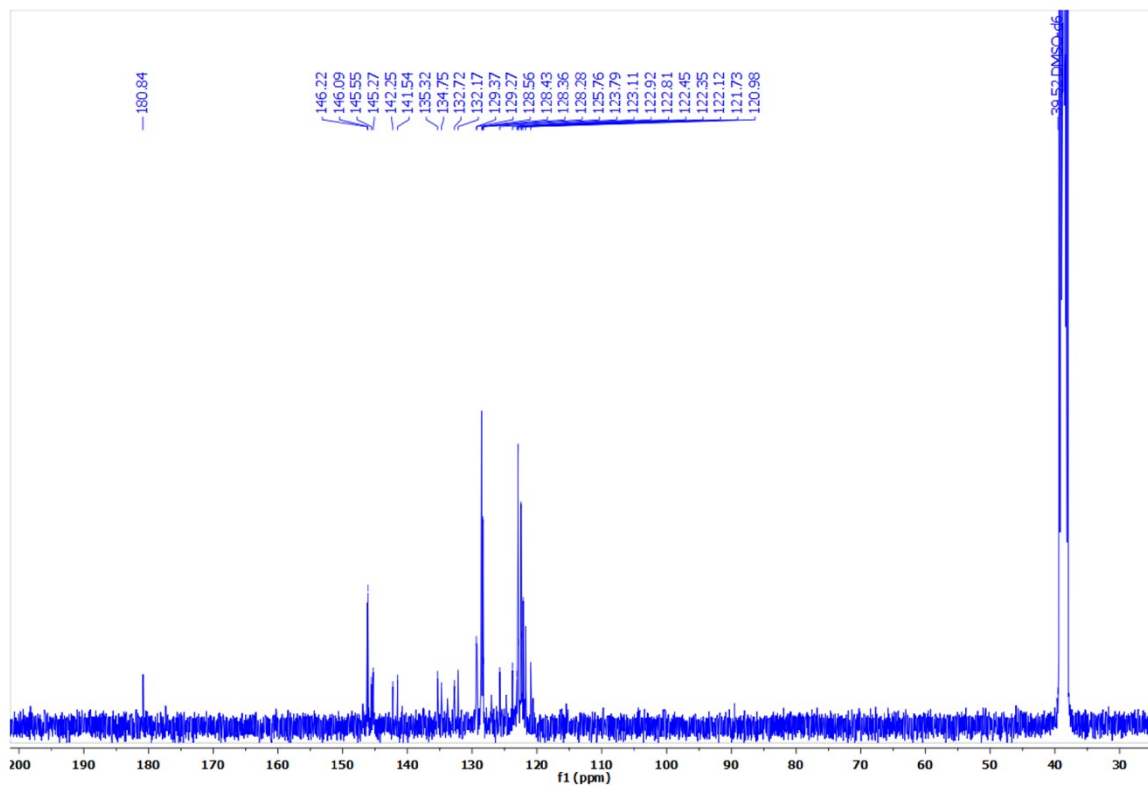

Fig. S-4  $^{13}\text{C}$  NMR (100 MHz,  $\text{CDCl}_3$ ) spectrum of compound **5a**.

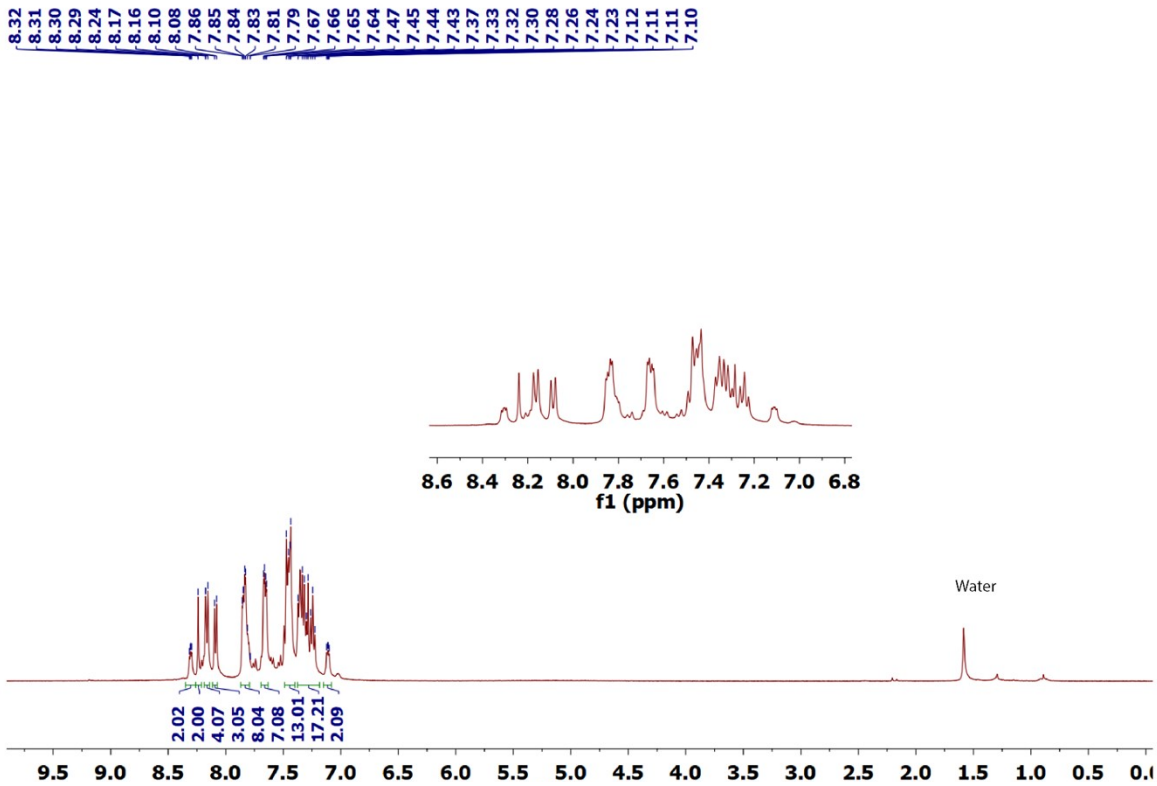

Fig. S-5  $^1\text{H}$  NMR (400 MHz,  $\text{CDCl}_3$ ) spectrum of compound **5b**.

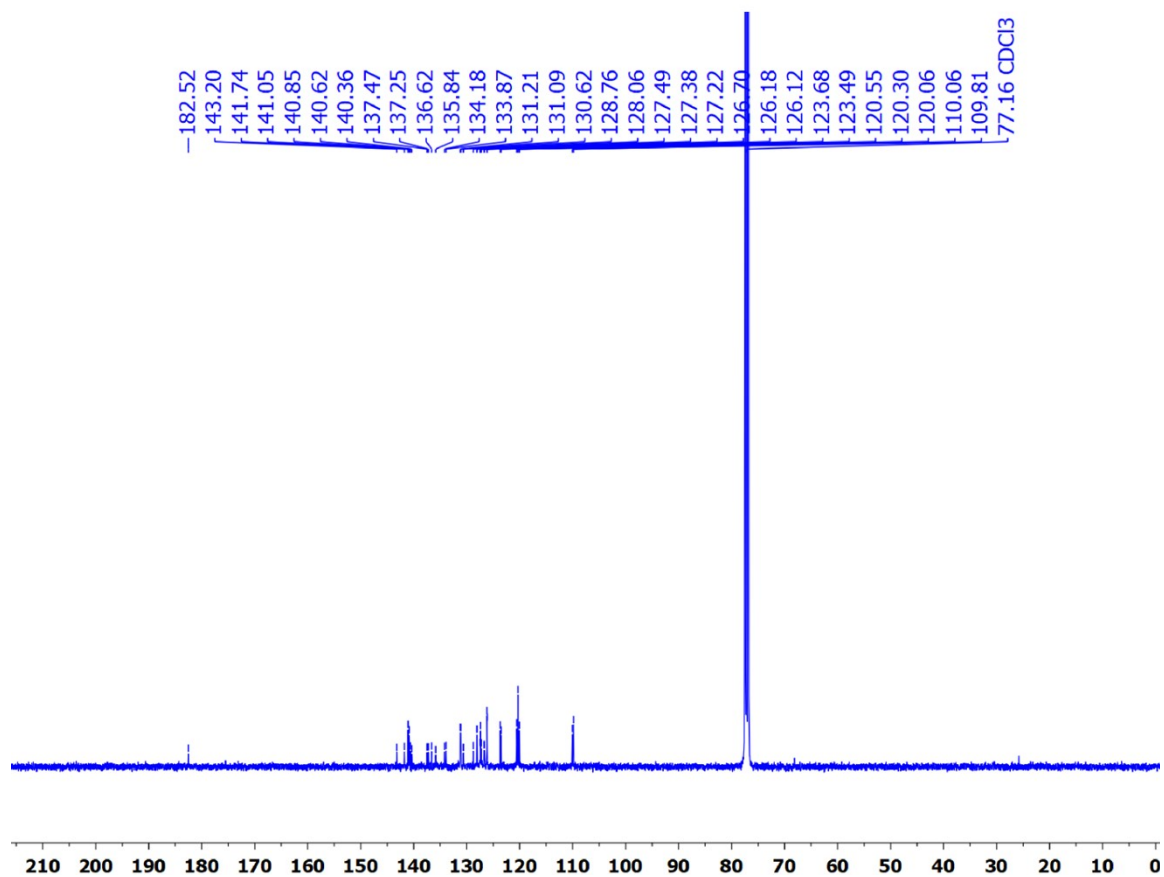

Fig. S-6 <sup>13</sup>C NMR (100 MHz, CDCl<sub>3</sub>) spectrum of compound 5b.

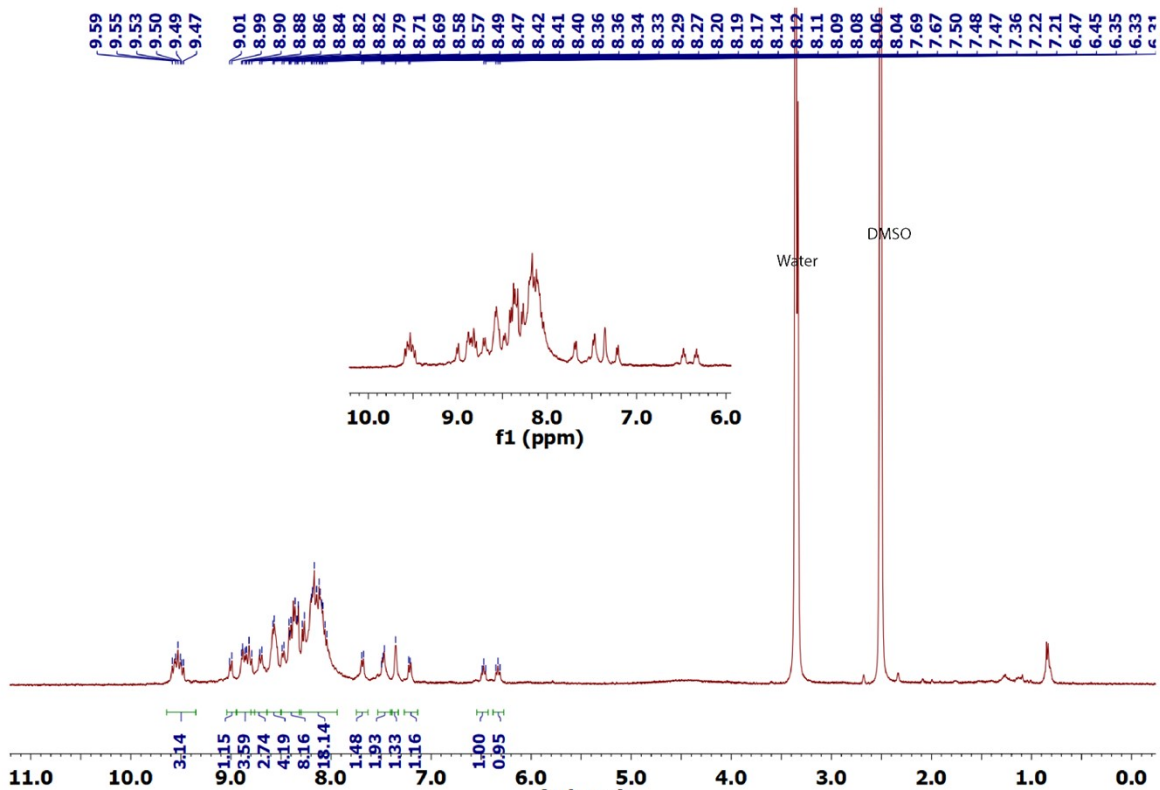

Fig. S-7  $^1\text{H}$  NMR (400 MHz,  $\text{CDCl}_3$ ) spectrum of compound **5c**



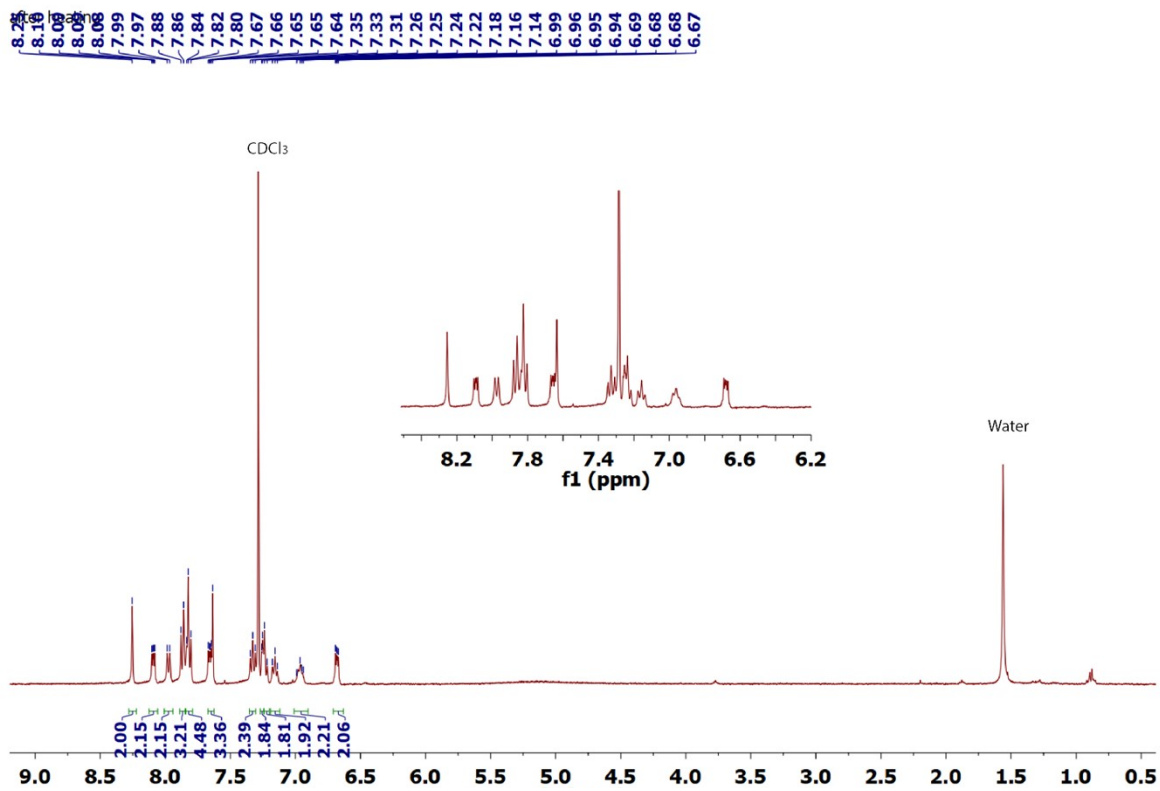

Fig. S-8 <sup>1</sup>H NMR (400 MHz, CDCl<sub>3</sub>) spectrum of compound 5d.

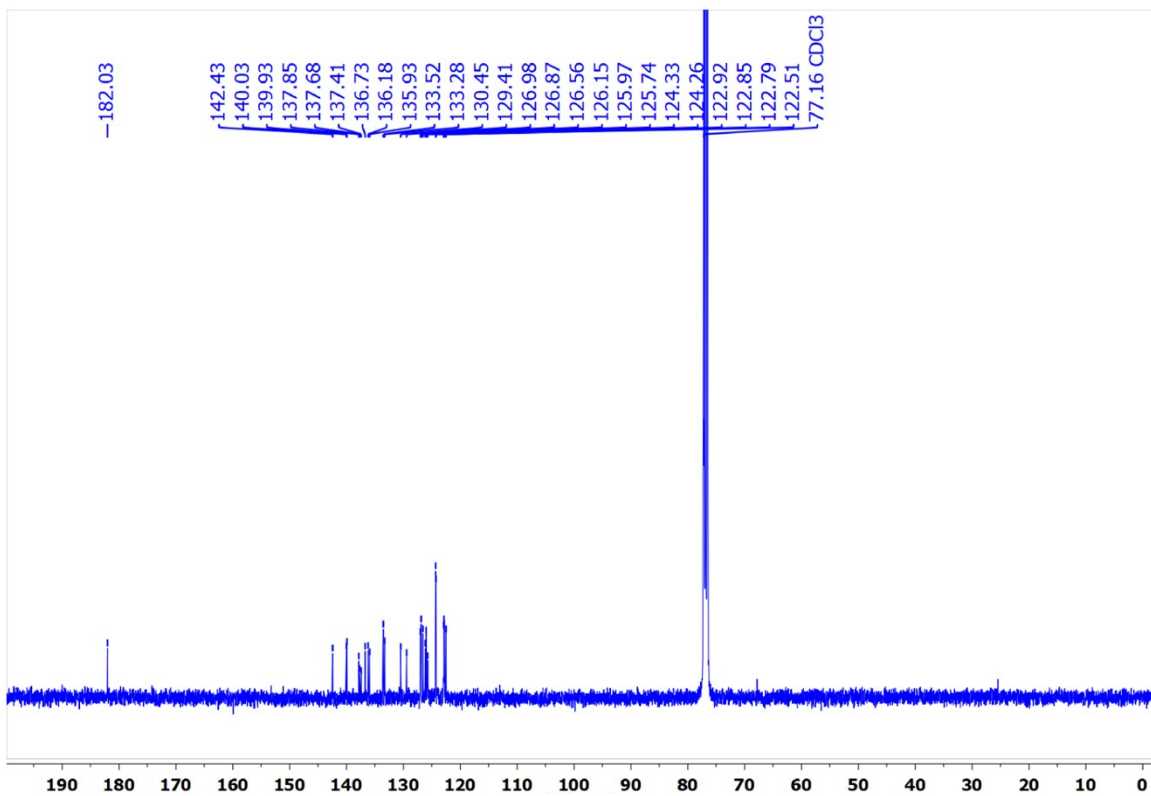

**Fig. S-9** <sup>13</sup>C NMR (100 MHz, CDCl<sub>3</sub>) spectrum of compound **5d**.

## 2. UV-Vis Titrations of Compounds **2** and TPA **7** with TFA

The UV-vis of a solution of **2** and TPA derivative **7** in  $\text{CHCl}_3$  was measured. One equivalent of TFA was added each time to the solution and the UV-Vis data was collected.

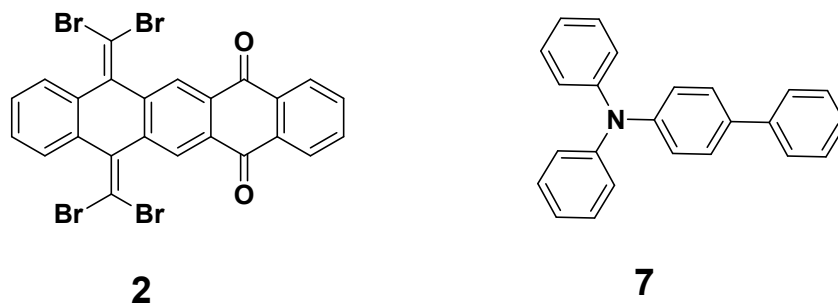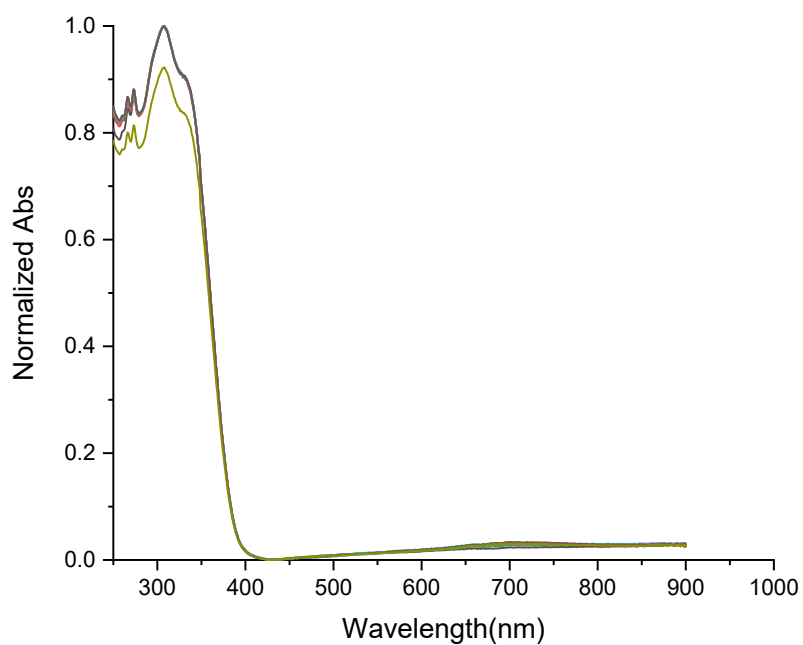

**Fig. S-10** Normalized absorption spectra of **2** and **7** (46.50  $\mu\text{M}$  in  $\text{CHCl}_3$ ) mixed with TFA (up to 8 mole equivalents).

# High-Resolution Mass Spectra for Compounds 3a and 5a-c

## Target Compound Screening Report

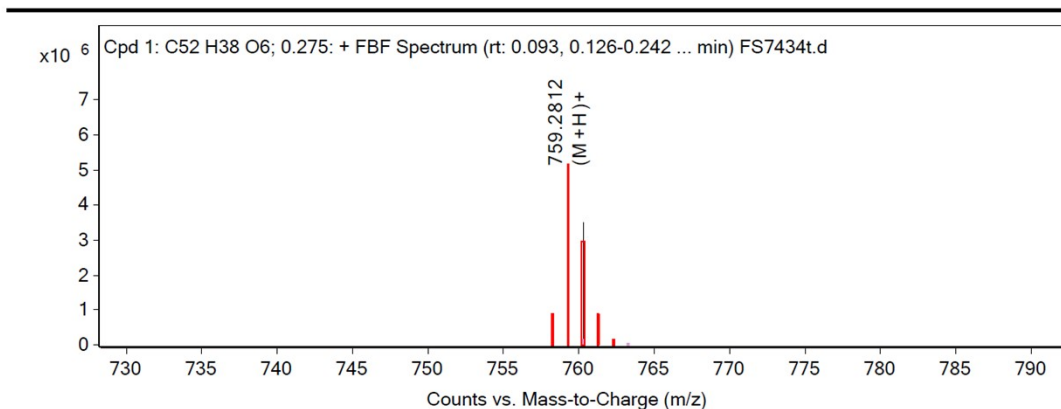

### MS Spectrum Peak List

| Obs. m/z | Charge | Abund      | Ion/Isotope |
|----------|--------|------------|-------------|
| 758.2683 | 1      | 879758.06  | M+          |
| 759.2812 | 1      | 5164614.5  | (M+H)+      |
| 760.2833 | 1      | 3503861.25 | (M+H)+      |
| 761.283  | 1      | 383746.66  | (M+H)+      |
| 762.2936 | 1      | 71024.84   | (M+H)+      |

### MS Zoomed Spectrum

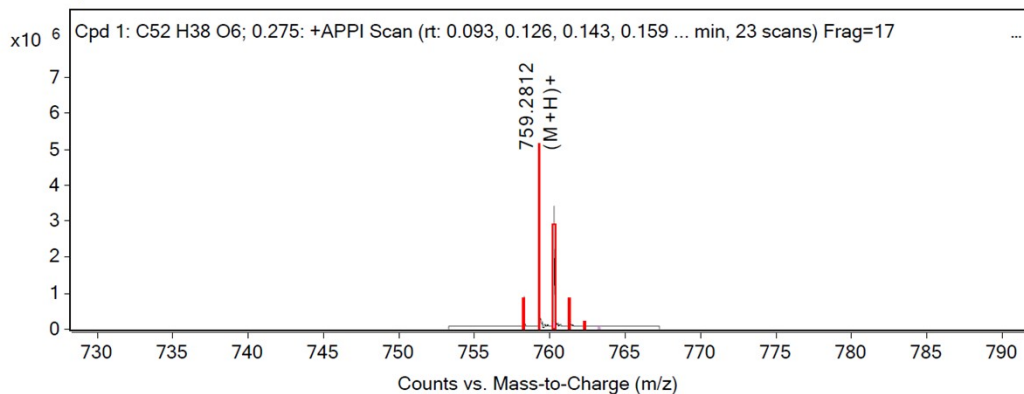

### MS Spectrum Peak List

| Obs. m/z | Charge | Abund      | Ion/Isotope | Tgt Mass Error (ppm) |
|----------|--------|------------|-------------|----------------------|
| 758.2683 | 1      | 879758.06  | M+          | -2.64                |
| 759.2799 |        | 5116371.58 |             |                      |
| 759.2812 | 1      | 5164614.5  | (M+H)+      | -9.31                |
| 760.2833 | 1      | 3503861.25 | (M+H)+      | -7.58                |
| 761.283  | 1      | 383746.66  | (M+H)+      | -3.04                |
| 762.2936 | 1      | 71024.84   | (M+H)+      | -12.9                |

--- End Of Report ---

Fig. S-11 High-resolution mass spectrum (LC-TOF, positive mode) of compound 3a.

### Target Compound Screening Report

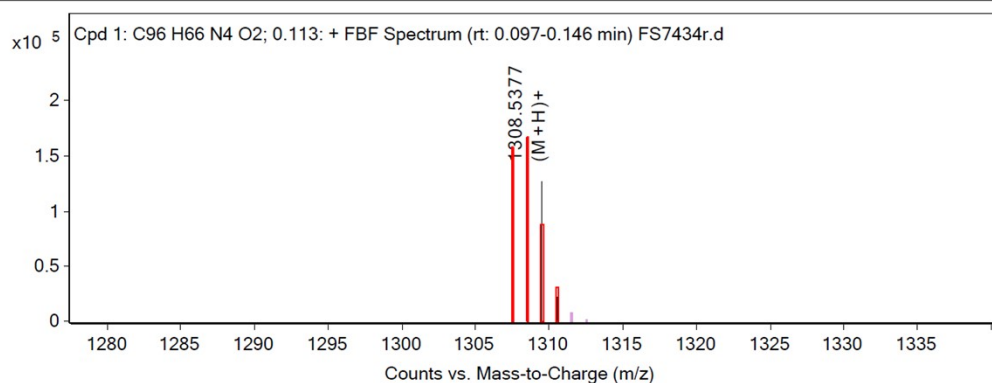

#### MS Spectrum Peak List

| Obs. m/z  | Charge | Abund     | Ion/Isotope |
|-----------|--------|-----------|-------------|
| 1307.5336 | 1      | 138185.13 | (M+H)+      |
| 1308.5377 | 1      | 156451.55 | (M+H)+      |
| 1309.5414 | 1      | 126036.31 | (M+H)+      |
| 1310.5714 | 1      | 21983.62  | (M+H)+      |

#### MS Zoomed Spectrum

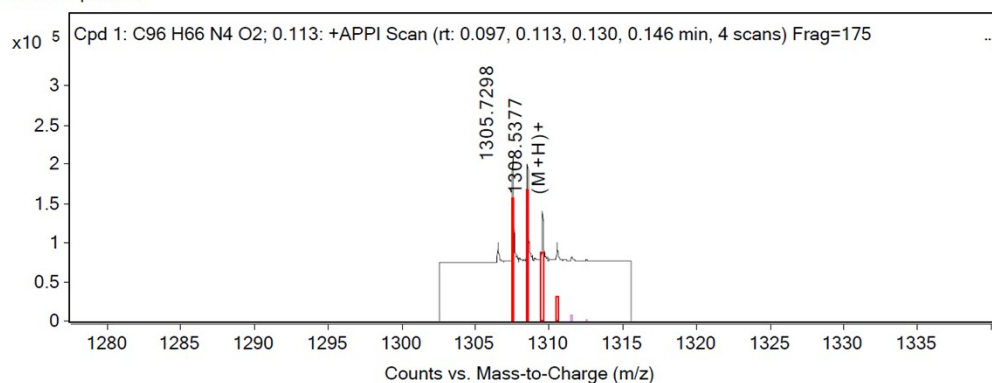

#### MS Spectrum Peak List

| Obs. m/z  | Charge | Abund     | Ion/Isotope | Tgt Mass Error (ppm) |
|-----------|--------|-----------|-------------|----------------------|
| 1305.7298 |        | 209506.9  |             |                      |
| 1307.5336 | 1      | 138185.13 | (M+H)+      | -5.9                 |
| 1308.5377 | 1      | 156451.55 | (M+H)+      | -6.55                |
| 1309.5414 | 1      | 126036.31 | (M+H)+      | -6.87                |
| 1310.5714 | 1      | 21983.62  | (M+H)+      | -27.27               |

--- End Of Report ---

**Fig. S-12** High-resolution mass spectrum (LC-TOF, positive mode) of compound **5a**.

Raw output

Yuming\_Compound3 (0.014) Is (1.00,1.00) C<sub>96</sub>H<sub>58</sub>N<sub>4</sub>O<sub>2</sub>

TOF MS ES+  
3.68e12

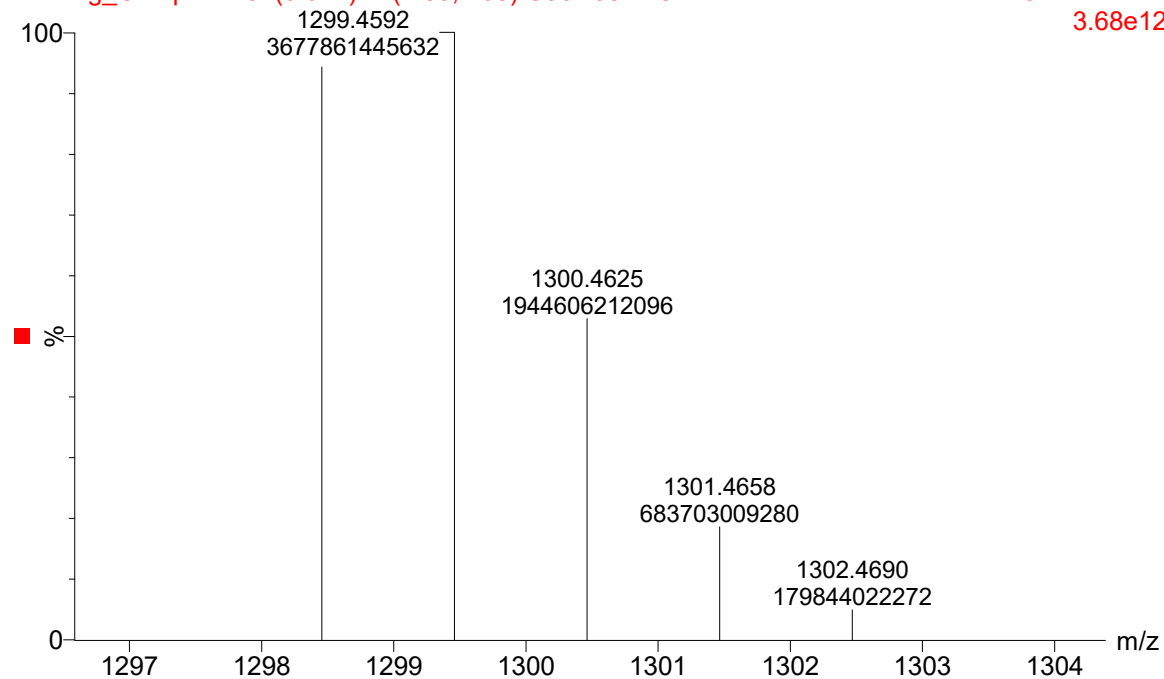

Yuming\_Compound3 28 (0.467) AM2 (Ar,30000.0,0.00,0.00); Cm (1:37)

TOF MS ES+  
8.31e3

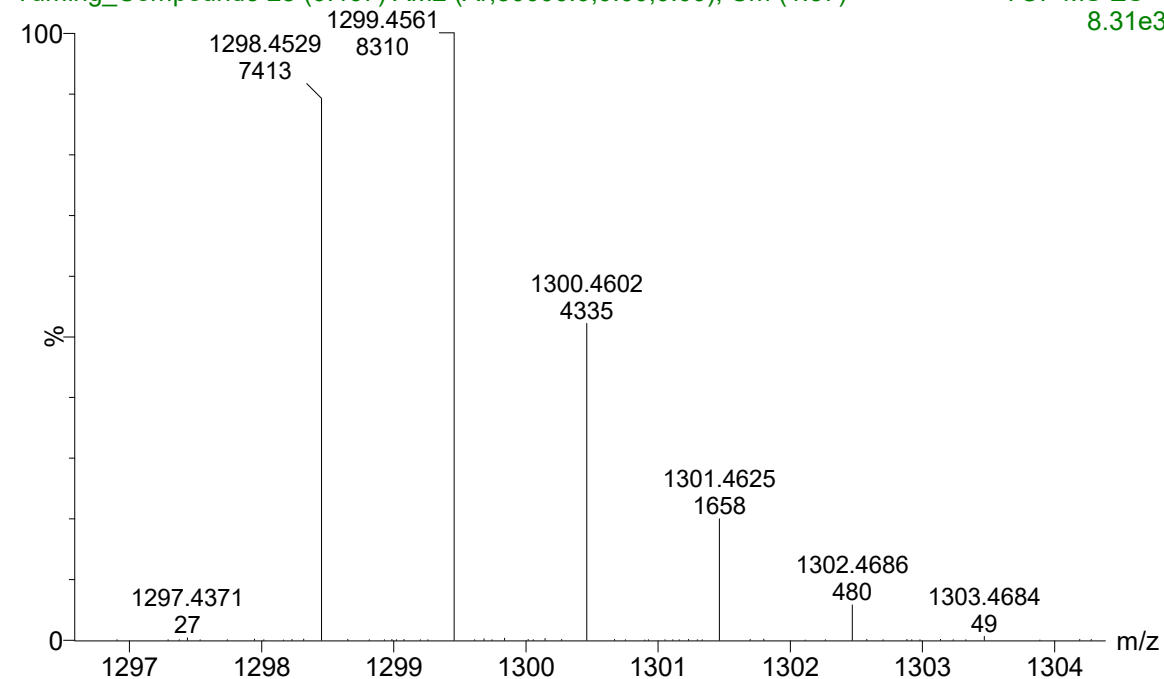

Fig. S-13 High-resolution mass spectrum (positive mode) of compound 5b was measured using a cyclic IMS cyclic ion mobility mass spectrometer (Wilmslow, UK).

## Target Compound Screening Report

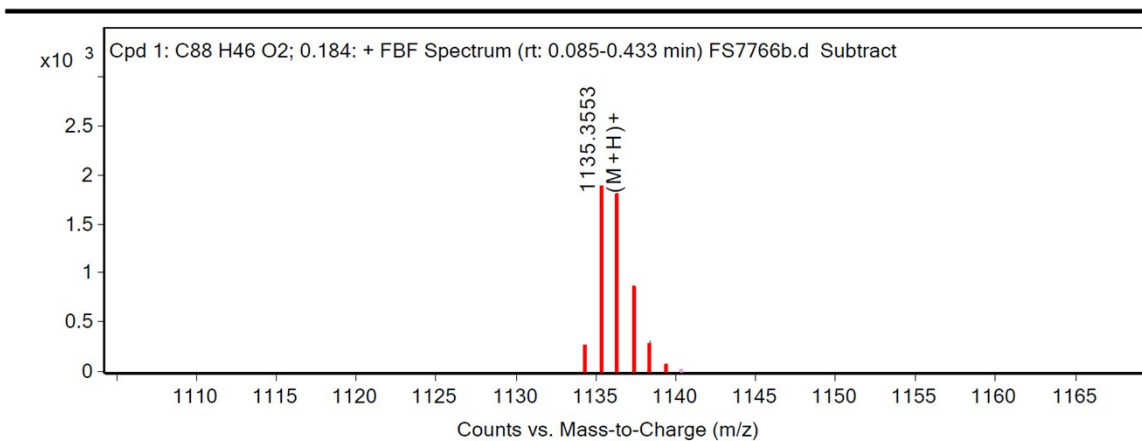

### MS Spectrum Peak List

| Obs. m/z  | Charge | Abund   | Ion/Isotope |
|-----------|--------|---------|-------------|
| 1134.3477 | 1      | 258.56  | (M+H)+[-H]  |
| 1135.3553 | 1      | 1880.6  | (M+H)+      |
| 1136.3585 | 1      | 1677.68 | (M+H)+      |
| 1137.3597 | 1      | 823.66  | (M+H)+      |
| 1138.3642 | 1      | 311.19  | (M+H)+      |
| 1139.3618 | 1      | 28.66   | (M+H)+      |

### MS Zoomed Spectrum

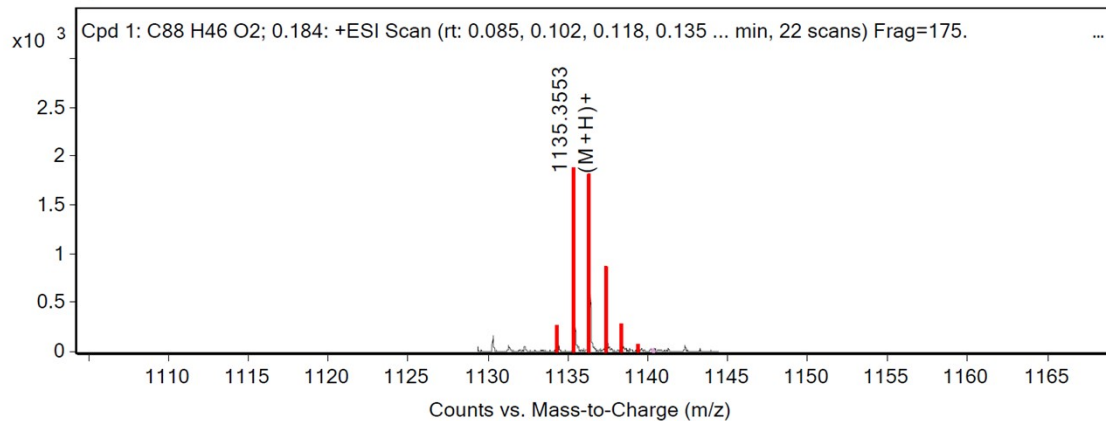

### MS Spectrum Peak List

| Obs. m/z  | Charge | Abund   | Ion/Isotope | Tgt Mass Error (ppm) |
|-----------|--------|---------|-------------|----------------------|
| 1134.3477 | 1      | 258.56  | (M+H)+[-H]  | 1.35                 |
| 1135.3551 |        | 1879.88 |             |                      |
| 1135.3553 | 1      | 1880.6  | (M+H)+      | 1.51                 |
| 1136.3585 | 1      | 1677.68 | (M+H)+      | 1.69                 |
| 1137.3597 | 1      | 823.66  | (M+H)+      | 3.61                 |
| 1138.3642 | 1      | 311.19  | (M+H)+      | 2.52                 |
| 1139.3618 | 1      | 28.66   | (M+H)+      | 7.54                 |

--- End Of Report ---

**Fig. S-14** High-resolution mass spectrum (LC-TOF, positive mode) of compound **5c**.

### Target Compound Screening Report

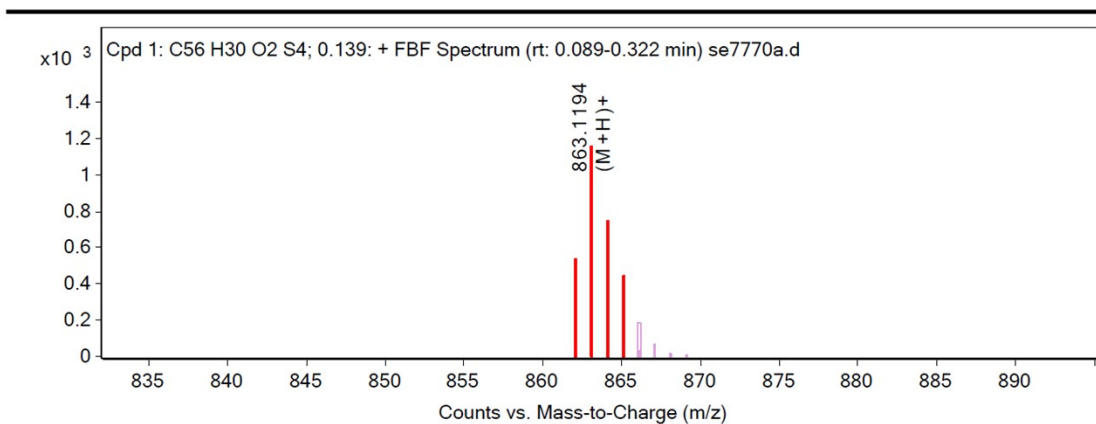

#### MS Spectrum Peak List

| Obs. m/z | Charge | Abund   | Ion/Isotope |
|----------|--------|---------|-------------|
| 862.11   | 1      | 535.71  | M+          |
| 863.1194 | 1      | 1157.65 | (M+H)+      |
| 864.1226 | 1      | 701.45  | (M+H)+      |
| 865.1191 | 1      | 433.22  | (M+H)+      |

#### MS Zoomed Spectrum

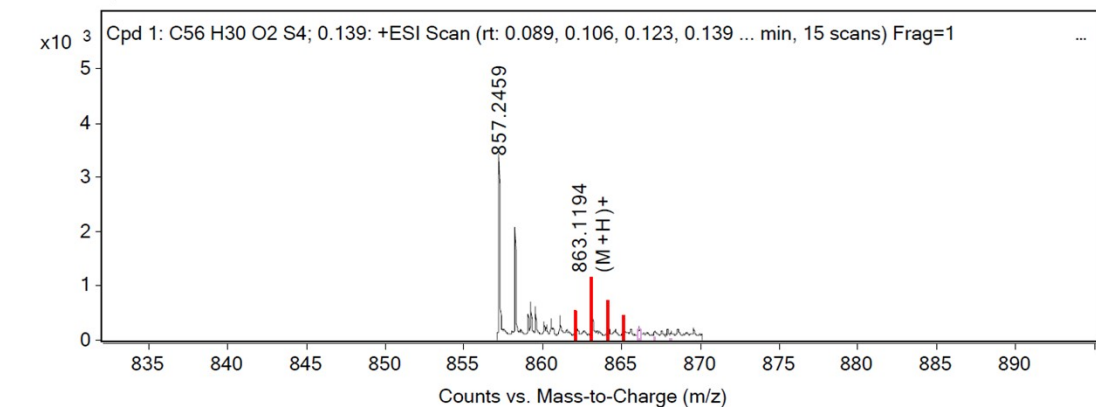

#### MS Spectrum Peak List

| Obs. m/z | Charge | Abund   | Ion/Isotope | Tgt Mass Error (ppm) |
|----------|--------|---------|-------------|----------------------|
| 857.2459 |        | 3420.65 |             |                      |
| 862.11   | 1      | 535.71  | M+          | 2.71                 |
| 863.1194 | 1      | 1157.65 | (M+H)+      | 0.9                  |
| 864.1226 | 1      | 701.45  | (M+H)+      | 0.79                 |
| 865.1191 | 1      | 433.22  | (M+H)+      | 2.91                 |

--- End Of Report ---

Fig. S-15 High-resolution mass spectrum (LC-TOF, positive mode) of compound **5d**.



Cartesian coordinates and optimized **5a** in gas phase:  $E(\text{RB3LYP}) = -4067.5408$  hartrees; Dipole Moment = 1.865279Debye; Basis Set = 6-31G(d,p).

|   |          |          |          |
|---|----------|----------|----------|
| O | 3.41700  | -4.27290 | -2.56700 |
| O | 5.32330  | 0.78200  | -2.95070 |
| C | 3.83620  | -3.12350 | -2.68610 |
| C | 5.27160  | -2.85850 | -2.99710 |
| C | 6.13630  | -3.94160 | -3.19030 |
| H | 5.72920  | -4.94340 | -3.10710 |
| C | 7.47990  | -3.72210 | -3.48050 |
| H | 8.14670  | -4.56600 | -3.63100 |
| C | 7.97180  | -2.41550 | -3.57740 |
| H | 9.02040  | -2.24550 | -3.80300 |
| C | 7.11910  | -1.33240 | -3.38360 |
| H | 7.47640  | -0.31080 | -3.45100 |
| C | 5.76630  | -1.54310 | -3.09390 |
| C | 4.87600  | -0.36150 | -2.88730 |
| C | 3.44080  | -0.62670 | -2.60500 |
| C | 2.57000  | 0.45120  | -2.43100 |
| H | 2.98050  | 1.44700  | -2.52200 |
| C | 1.21030  | 0.25370  | -2.15930 |
| C | 0.20790  | 1.34130  | -1.97260 |
| C | -1.07010 | 1.02450  | -2.67060 |
| C | -1.74610 | 1.98880  | -3.43230 |
| H | -1.35800 | 3.00090  | -3.46510 |
| C | -2.89180 | 1.65710  | -4.14790 |
| H | -3.39840 | 2.41370  | -4.73980 |
| C | -3.37100 | 0.34580  | -4.11980 |
| H | -4.25360 | 0.07310  | -4.69100 |
| C | -2.70380 | -0.62580 | -3.37820 |
| H | -3.06810 | -1.64440 | -3.38530 |
| C | -1.55350 | -0.30500 | -2.64230 |
| C | -0.74600 | -1.28690 | -1.86480 |
| C | 0.71420  | -1.07650 | -2.07950 |
| C | 1.58950  | -2.15020 | -2.27420 |
| H | 1.22840  | -3.17010 | -2.23100 |
| C | 2.94510  | -1.94500 | -2.52190 |
| C | 0.40210  | 2.45730  | -1.21080 |
| C | 1.74600  | 2.82760  | -0.65580 |
| C | 2.16380  | 2.37590  | 0.60320  |
| H | 1.51530  | 1.71960  | 1.17680  |
| C | 3.40730  | 2.72540  | 1.12120  |
| H | 3.72040  | 2.33370  | 2.08270  |
| C | 4.26610  | 3.57930  | 0.40830  |
| C | 2.60570  | 3.68470  | -1.35970 |
| C | 3.83630  | 4.06870  | -0.83600 |
| C | -0.70700 | 3.35800  | -0.77700 |
| C | -0.54420 | 4.75450  | -0.74110 |
| H | 0.39460  | 5.19240  | -1.06320 |
| C | -1.55250 | 5.59620  | -0.28570 |

|   |          |          |          |
|---|----------|----------|----------|
| H | -1.39490 | 6.66920  | -0.27300 |
| C | -2.77150 | 5.07010  | 0.17210  |
| C | -1.92490 | 2.84310  | -0.29460 |
| C | -2.93820 | 3.67460  | 0.16430  |
| C | -1.24890 | -2.23140 | -1.02040 |
| C | -2.71930 | -2.48220 | -0.85640 |
| C | -3.45200 | -1.79410 | 0.12130  |
| H | -2.95140 | -1.05370 | 0.73870  |
| C | -4.80350 | -2.05160 | 0.32890  |
| H | -5.34770 | -1.50720 | 1.09300  |
| C | -5.47360 | -3.01500 | -0.44270 |
| C | -3.39120 | -3.45620 | -1.61020 |
| C | -4.74600 | -3.71560 | -1.41740 |
| C | -0.38530 | -3.04040 | -0.10900 |
| C | -0.50670 | -4.43880 | -0.04140 |
| H | -1.25970 | -4.94190 | -0.63940 |
| C | 0.32970  | -5.19930 | 0.76620  |
| H | 0.23420  | -6.27960 | 0.78110  |
| C | 1.31500  | -4.58410 | 1.55590  |
| C | 0.56270  | -2.43130 | 0.73140  |
| C | 1.40060  | -3.18240 | 1.54690  |
| N | -3.80100 | 5.92350  | 0.64130  |
| H | -3.86600 | 3.24440  | 0.52530  |
| H | -2.08220 | 1.77020  | -0.28470 |
| C | -4.58330 | 5.54890  | 1.76930  |
| C | -3.97760 | 4.98010  | 2.90100  |
| C | -5.97310 | 5.74790  | 1.76820  |
| C | -4.75020 | 4.61010  | 3.99980  |
| H | -2.90310 | 4.83110  | 2.91160  |
| C | -6.73450 | 5.39170  | 2.87920  |
| H | -6.44770 | 6.18240  | 0.89480  |
| C | -6.13110 | 4.81670  | 3.99930  |
| H | -4.26550 | 4.17110  | 4.86720  |
| H | -7.80870 | 5.55240  | 2.86160  |
| H | -6.72880 | 4.53340  | 4.86020  |
| C | -4.05190 | 7.16450  | -0.00760 |
| C | -4.29640 | 8.32440  | 0.74460  |
| C | -4.06370 | 7.24670  | -1.40930 |
| C | -4.55430 | 9.53510  | 0.10490  |
| H | -4.28340 | 8.26900  | 1.82790  |
| C | -4.30430 | 8.46580  | -2.03940 |
| H | -3.88340 | 6.35240  | -1.99620 |
| C | -4.55550 | 9.61620  | -1.28900 |
| H | -4.74120 | 10.42290 | 0.70230  |
| H | -4.30970 | 8.51160  | -3.12470 |
| H | -4.74970 | 10.56280 | -1.78370 |
| H | -5.24690 | -4.46070 | -2.02600 |
| H | -2.85270 | -4.00330 | -2.37950 |
| N | -6.85420 | -3.27390 | -0.24150 |
| C | -7.34190 | -4.60940 | -0.29180 |
| C | -8.53780 | -4.90680 | -0.96450 |
| C | -6.63460 | -5.64980 | 0.33170  |

|   |           |          |          |
|---|-----------|----------|----------|
| C | -9.01580  | -6.21510 | -1.00250 |
| H | -9.08660  | -4.10870 | -1.45300 |
| C | -7.11120  | -6.95780 | 0.27200  |
| H | -5.71380  | -5.42600 | 0.85990  |
| C | -8.30530  | -7.24940 | -0.39010 |
| H | -9.94290  | -6.42730 | -1.52730 |
| H | -6.55120  | -7.75050 | 0.75990  |
| H | -8.67730  | -8.26850 | -0.42810 |
| C | -7.75450  | -2.19870 | -0.00450 |
| C | -8.77170  | -2.32130 | 0.95580  |
| C | -7.64200  | -0.99990 | -0.72710 |
| C | -9.65900  | -1.27030 | 1.17760  |
| H | -8.86090  | -3.24180 | 1.52260  |
| C | -8.52250  | 0.05220  | -0.48400 |
| H | -6.86210  | -0.89840 | -1.47430 |
| C | -9.53900  | -0.07590 | 0.46450  |
| H | -10.44000 | -1.38280 | 1.92420  |
| H | -8.41960  | 0.97280  | -1.05130 |
| H | -10.22730 | 0.74360  | 0.64580  |
| N | 5.53690   | 3.93090  | 0.92600  |
| H | 4.47920   | 4.73390  | -1.40120 |
| H | 2.30840   | 4.05580  | -2.33680 |
| C | 6.65640   | 4.06780  | 0.05560  |
| C | 7.59170   | 5.09400  | 0.26480  |
| C | 6.84070   | 3.18470  | -1.02050 |
| C | 8.69300   | 5.22390  | -0.57900 |
| H | 7.45070   | 5.78500  | 1.08910  |
| C | 7.93320   | 3.33940  | -1.87120 |
| H | 6.12710   | 2.39010  | -1.20660 |
| C | 8.86990   | 4.35190  | -1.65490 |
| H | 9.40730   | 6.02290  | -0.40100 |
| H | 8.04790   | 2.65160  | -2.70380 |
| H | 9.72350   | 4.46280  | -2.31670 |
| C | 5.70820   | 4.11720  | 2.32650  |
| C | 4.78180   | 4.87220  | 3.06320  |
| C | 6.80790   | 3.55200  | 2.99110  |
| C | 4.94960   | 5.04630  | 4.43540  |
| H | 3.93380   | 5.31760  | 2.55360  |
| C | 6.97740   | 3.74710  | 4.36030  |
| H | 7.52450   | 2.96420  | 2.42750  |
| C | 6.04900   | 4.49010  | 5.09230  |
| H | 4.22330   | 5.63350  | 4.99020  |
| H | 7.83400   | 3.30270  | 4.85910  |
| H | 6.18080   | 4.63410  | 6.16020  |
| H | 0.66100   | -1.35060 | 0.72510  |
| H | 2.13810   | -2.68660 | 2.16860  |
| N | 2.20580   | -5.36800 | 2.33040  |
| C | 2.58450   | -4.94500 | 3.63280  |
| C | 3.91880   | -5.04240 | 4.06000  |
| C | 1.62470   | -4.42250 | 4.51520  |
| C | 4.27720   | -4.63340 | 5.34270  |
| H | 4.66740   | -5.43870 | 3.38260  |

|   |         |          |          |
|---|---------|----------|----------|
| C | 1.99700 | -3.99930 | 5.78920  |
| H | 0.59050 | -4.35230 | 4.19530  |
| C | 3.32270 | -4.10540 | 6.21430  |
| H | 5.31410 | -4.71550 | 5.65590  |
| H | 1.24090 | -3.59790 | 6.45800  |
| H | 3.60780 | -3.78160 | 7.21050  |
| C | 2.78320 | -6.53920 | 1.76090  |
| C | 2.92930 | -7.70290 | 2.53250  |
| C | 3.21050 | -6.54620 | 0.42300  |
| C | 3.50110 | -8.84590 | 1.97740  |
| H | 2.59380 | -7.70370 | 3.56430  |
| C | 3.76230 | -7.70170 | -0.12670 |
| H | 3.10680 | -5.65530 | -0.18770 |
| C | 3.91680 | -8.85540 | 0.64450  |
| H | 3.60740 | -9.73790 | 2.58830  |
| H | 4.08370 | -7.68860 | -1.16410 |
| H | 4.35420 | -9.75050 | 0.21270  |

## Crystallographic Data and Detailed Refinements for 3a

**Table S-1.** Crystal data and structure refinement of **3a**

|                                                     |                                                                              |
|-----------------------------------------------------|------------------------------------------------------------------------------|
| Identification code                                 | Ey-MOME( <b>3a</b> )                                                         |
| Empirical formula                                   | C <sub>52</sub> H <sub>38</sub> O <sub>6</sub>                               |
| Formula weight                                      | 758.82                                                                       |
| Temperature/K                                       | 100(2)                                                                       |
| Crystal system                                      | monoclinic                                                                   |
| Space group                                         | <i>Ia</i>                                                                    |
| <i>a</i> /Å                                         | 7.32520(10)                                                                  |
| <i>b</i> /Å                                         | 22.6642(2)                                                                   |
| <i>c</i> /Å                                         | 23.2798(2)                                                                   |
| $\beta$ /°                                          | 92.4510(10)                                                                  |
| Volume/Å <sup>3</sup>                               | 3861.37(7)                                                                   |
| <i>Z</i>                                            | 4                                                                            |
| $\rho_{\text{calc}}$ /g/cm <sup>3</sup>             | 1.305                                                                        |
| $\mu$ /mm <sup>-1</sup>                             | 0.676                                                                        |
| <i>F</i> (000)                                      | 1592.0                                                                       |
| Crystal size/mm <sup>3</sup>                        | 0.1 × 0.03 × 0.03                                                            |
| Radiation                                           | Cu <i>K</i> α ( $\lambda$ = 1.54184)                                         |
| 2 $\theta$ range for data collection/°              | 5.444 to 158.436                                                             |
| Index ranges                                        | -9 ≤ <i>h</i> ≤ 9, -28 ≤ <i>k</i> ≤ 27, -29 ≤ <i>l</i> ≤ 29                  |
| Reflections collected                               | 49012                                                                        |
| Independent reflections                             | 7972 [ <i>R</i> <sub>int</sub> = 0.0557, <i>R</i> <sub>sigma</sub> = 0.0368] |
| Data/restraints/parameters                          | 7972/2/527                                                                   |
| Goodness-of-fit on <i>F</i> <sup>2</sup>            | 1.056                                                                        |
| Final <i>R</i> indexes [ <i>I</i> ≥ 2σ( <i>I</i> )] | <i>R</i> <sub>1</sub> = 0.0434, <i>wR</i> <sub>2</sub> = 0.1115              |
| Final <i>R</i> indexes [all data]                   | <i>R</i> <sub>1</sub> = 0.0449, <i>wR</i> <sub>2</sub> = 0.1127              |
| Largest diff. peak/hole / e Å <sup>-3</sup>         | 0.35/-0.19                                                                   |
| Flack parameter                                     | -0.06(11)                                                                    |

**Table S-2.** Fractional Atomic Coordinates ( $\times 10^4$ ) and Equivalent Isotropic Displacement Parameters $(\text{\AA}^2 \times 10^3)$  of **3a**.  $U_{\text{eq}}$  is defined as 1/3 of the trace of the orthogonalised  $U_{\text{IJ}}$  tensor.

| Atom | <i>x</i>  | <i>y</i>    | <i>z</i>    | $U(\text{eq})$ |
|------|-----------|-------------|-------------|----------------|
| O1   | 6961 (4)  | 4087.2 (10) | 3521.0 (9)  | 39.8 (5)       |
| O2   | 6299 (4)  | 4690.8 (10) | 5740.3 (10) | 43.2 (6)       |
| O3   | 6067 (3)  | -615.5 (9)  | 3803.5 (10) | 36.7 (5)       |
| O4   | -555 (3)  | 2794.9 (11) | 3166.3 (11) | 43.0 (6)       |
| O5   | 4128 (4)  | 218.1 (10)  | 7429.1 (10) | 42.4 (5)       |
| O6   | 1300 (4)  | 4274.3 (10) | 6870.0 (11) | 44.8 (6)       |
| C1   | 6930 (4)  | 2104.2 (12) | 4606.5 (12) | 26.8 (5)       |
| C2   | 6740 (4)  | 2737.6 (12) | 4750.6 (12) | 27.1 (5)       |
| C3   | 6784 (4)  | 3176.0 (12) | 4331.9 (12) | 28.3 (6)       |
| C4   | 6709 (4)  | 3767.3 (12) | 4483.1 (12) | 27.8 (6)       |
| C5   | 6839 (4)  | 4224.2 (13) | 4023.1 (13) | 31.3 (6)       |
| C6   | 6808 (4)  | 4855.4 (13) | 4206.0 (14) | 31.9 (6)       |
| C7   | 6940 (5)  | 5294.4 (14) | 3791.3 (15) | 39.0 (7)       |
| C8   | 6956 (5)  | 5882.4 (15) | 3956.0 (17) | 45.1 (8)       |
| C9   | 6861 (5)  | 6036.0 (14) | 4529.2 (17) | 44.4 (8)       |
| C10  | 6711 (5)  | 5603.8 (14) | 4945.4 (15) | 38.1 (7)       |
| C11  | 6678 (4)  | 5011.9 (13) | 4783.9 (13) | 31.6 (6)       |
| C12  | 6502 (4)  | 4552.5 (13) | 5239.1 (13) | 31.7 (6)       |
| C13  | 6579 (4)  | 3922.9 (12) | 5062.1 (12) | 28.2 (5)       |
| C14  | 6517 (4)  | 3486.4 (13) | 5481.4 (12) | 29.3 (6)       |
| C15  | 6609 (4)  | 2892.0 (12) | 5335.8 (12) | 27.7 (6)       |
| C16  | 6628 (4)  | 2384.8 (12) | 5746.6 (12) | 27.9 (5)       |
| C17  | 8016 (4)  | 1936.0 (12) | 5600.0 (12) | 28.0 (6)       |
| C18  | 9168 (4)  | 1674.6 (13) | 6016.6 (13) | 30.8 (6)       |
| C19  | 10493 (4) | 1278.3 (13) | 5861.7 (14) | 34.8 (6)       |
| C20  | 10678 (4) | 1135.3 (13) | 5289.2 (14) | 34.2 (6)       |
| C21  | 9547 (4)  | 1391.2 (12) | 4864.3 (13) | 30.8 (6)       |
| C22  | 8208 (4)  | 1794.6 (12) | 5017.2 (12) | 27.8 (6)       |
| C23  | 5934 (4)  | 1841.7 (12) | 4179.3 (12) | 28.4 (6)       |
| C24  | 6069 (4)  | 1196.8 (13) | 4062.5 (13) | 29.7 (6)       |
| C25  | 5342 (4)  | 802.2 (13)  | 4450.7 (13) | 32.6 (6)       |
| C26  | 5360 (4)  | 201.4 (14)  | 4352.8 (13) | 34.4 (6)       |
| C27  | 6097 (4)  | -15.4 (13)  | 3854.9 (13) | 31.1 (6)       |
| C28  | 6791 (4)  | 366.6 (13)  | 3454.2 (13) | 32.7 (6)       |
| C29  | 6783 (4)  | 973.5 (13)  | 3565.0 (13) | 32.2 (6)       |
| C30  | 6636 (5)  | -860.6 (14) | 3278.1 (15) | 41.1 (7)       |
| C31  | 4326 (4)  | 2134.5 (12) | 3886.9 (12) | 27.7 (6)       |

| <b>Atom</b> | <b><i>x</i></b> | <b><i>y</i></b> | <b><i>z</i></b> | <b>U(eq)</b> |
|-------------|-----------------|-----------------|-----------------|--------------|
| C32         | 4102 (4)        | 2192.5 (13)     | 3293.7 (13)     | 32.7 (6)     |
| C33         | 2492 (5)        | 2409.7 (13)     | 3037.0 (13)     | 34.0 (6)     |
| C34         | 1075 (4)        | 2576.2 (12)     | 3373.9 (13)     | 33.0 (6)     |
| C35         | 1263 (4)        | 2513.8 (13)     | 3968.2 (13)     | 33.3 (6)     |
| C36         | 2856 (4)        | 2298.5 (13)     | 4218.0 (13)     | 30.9 (6)     |
| C37         | -683 (6)        | 2947.8 (19)     | 2576.6 (17)     | 52.3 (9)     |
| C38         | 5441 (4)        | 2311.1 (12)     | 6172.6 (12)     | 28.4 (6)     |
| C39         | 5170 (4)        | 1742.1 (13)     | 6481.4 (12)     | 29.2 (6)     |
| C40         | 5195 (4)        | 1195.0 (14)     | 6213.8 (13)     | 32.8 (6)     |
| C41         | 4856 (4)        | 671.1 (13)      | 6511.0 (14)     | 34.4 (6)     |
| C42         | 4489 (4)        | 696.9 (14)      | 7091.0 (14)     | 34.8 (6)     |
| C43         | 4445 (5)        | 1236.2 (15)     | 7365.0 (14)     | 38.6 (7)     |
| C44         | 4770 (5)        | 1746.5 (14)     | 7064.4 (14)     | 34.6 (6)     |
| C45         | 4349 (5)        | -354.4 (14)     | 7196.1 (17)     | 44.3 (8)     |
| C46         | 4254 (4)        | 2811.5 (12)     | 6353.7 (12)     | 29.6 (6)     |
| C47         | 2493 (4)        | 2889.3 (13)     | 6137.6 (13)     | 34.0 (6)     |
| C48         | 1442 (5)        | 3374.3 (14)     | 6299.3 (14)     | 38.0 (7)     |
| C49         | 2179 (5)        | 3780.0 (13)     | 6688.4 (13)     | 35.6 (7)     |
| C50         | 3934 (5)        | 3700.0 (14)     | 6924.8 (13)     | 36.1 (7)     |
| C51         | 4952 (5)        | 3221.0 (13)     | 6758.2 (13)     | 34.1 (6)     |
| C52         | -491 (5)        | 4390.6 (16)     | 6633.7 (18)     | 49.2 (9)     |

**Table S-3.** Selected Bond Distances (Å)

| <b>Atom</b> | <b>Atom</b> | <b>Length/Å</b> | <b>Atom</b> | <b>Atom</b> | <b>Length/Å</b> |
|-------------|-------------|-----------------|-------------|-------------|-----------------|
| O1          | C5          | 1.216 (4)       | C17         | C22         | 1.407 (4)       |
| O2          | C12         | 1.223 (4)       | C18         | C19         | 1.381 (4)       |
| O3          | C27         | 1.365 (3)       | C19         | C20         | 1.384 (5)       |
| O3          | C30         | 1.422 (4)       | C20         | C21         | 1.390 (4)       |
| O4          | C34         | 1.362 (4)       | C21         | C22         | 1.398 (4)       |
| O4          | C37         | 1.415 (4)       | C23         | C24         | 1.491 (4)       |
| O5          | C42         | 1.373 (4)       | C23         | C31         | 1.491 (4)       |
| O5          | C45         | 1.418 (4)       | C24         | C25         | 1.393 (4)       |
| O6          | C49         | 1.368 (4)       | C24         | C29         | 1.387 (4)       |
| O6          | C52         | 1.425 (5)       | C25         | C26         | 1.381 (4)       |
| C1          | C2          | 1.482 (4)       | C26         | C27         | 1.389 (4)       |
| C1          | C22         | 1.486 (4)       | C27         | C28         | 1.385 (4)       |
| C1          | C23         | 1.347 (4)       | C28         | C29         | 1.400 (4)       |
| C2          | C3          | 1.393 (4)       | C31         | C32         | 1.390 (4)       |
| C2          | C15         | 1.414 (4)       | C31         | C36         | 1.401 (4)       |
| C3          | C4          | 1.387 (4)       | C32         | C33         | 1.389 (5)       |
| C4          | C5          | 1.496 (4)       | C33         | C34         | 1.380 (4)       |
| C4          | C13         | 1.401 (4)       | C34         | C35         | 1.392 (4)       |
| C5          | C6          | 1.493 (4)       | C35         | C36         | 1.371 (4)       |
| C6          | C7          | 1.393 (4)       | C38         | C39         | 1.494 (4)       |
| C6          | C11         | 1.399 (4)       | C38         | C46         | 1.500 (4)       |
| C7          | C8          | 1.387 (5)       | C39         | C40         | 1.388 (4)       |
| C8          | C9          | 1.384 (6)       | C39         | C44         | 1.401 (4)       |
| C9          | C10         | 1.385 (5)       | C40         | C41         | 1.402 (4)       |
| C10         | C11         | 1.393 (4)       | C41         | C42         | 1.389 (5)       |
| C11         | C12         | 1.495 (4)       | C42         | C43         | 1.380 (5)       |
| C12         | C13         | 1.487 (4)       | C43         | C44         | 1.378 (4)       |
| C13         | C14         | 1.392 (4)       | C46         | C47         | 1.375 (5)       |
| C14         | C15         | 1.392 (4)       | C46         | C51         | 1.403 (4)       |
| C15         | C16         | 1.495 (4)       | C47         | C48         | 1.403 (5)       |
| C16         | C17         | 1.488 (4)       | C48         | C49         | 1.384 (5)       |
| C16         | C38         | 1.357 (4)       | C49         | C50         | 1.388 (5)       |
| C17         | C18         | 1.391 (4)       | C50         | C51         | 1.382 (4)       |



**Table S-4.** Selected Bond Angles

| <b>Atom</b> | <b>Atom</b> | <b>Atom</b> | <b>Angle/°</b> | <b>Atom</b> | <b>Atom</b> | <b>Atom</b> | <b>Angle/°</b> |
|-------------|-------------|-------------|----------------|-------------|-------------|-------------|----------------|
| C27         | O3          | C30         | 117.4(2)       | C21         | C22         | C1          | 125.1(3)       |
| C34         | O4          | C37         | 117.0(3)       | C21         | C22         | C17         | 119.7(3)       |
| C42         | O5          | C45         | 118.4(3)       | C1          | C23         | C24         | 122.0(3)       |
| C49         | O6          | C52         | 118.0(3)       | C1          | C23         | C31         | 122.2(2)       |
| C2          | C1          | C22         | 112.0(2)       | C31         | C23         | C24         | 114.2(2)       |
| C23         | C1          | C2          | 122.8(3)       | C25         | C24         | C23         | 118.7(3)       |
| C23         | C1          | C22         | 125.0(2)       | C29         | C24         | C23         | 122.7(3)       |
| C3          | C2          | C1          | 121.8(3)       | C29         | C24         | C25         | 118.4(3)       |
| C3          | C2          | C15         | 120.1(2)       | C26         | C25         | C24         | 121.3(3)       |
| C15         | C2          | C1          | 118.0(2)       | C25         | C26         | C27         | 119.6(3)       |
| C4          | C3          | C2          | 120.6(3)       | O3          | C27         | C26         | 114.8(3)       |
| C3          | C4          | C5          | 118.9(3)       | O3          | C27         | C28         | 124.6(3)       |
| C3          | C4          | C13         | 119.5(2)       | C28         | C27         | C26         | 120.5(3)       |
| C13         | C4          | C5          | 121.6(3)       | C27         | C28         | C29         | 119.1(3)       |
| O1          | C5          | C4          | 121.4(3)       | C24         | C29         | C28         | 121.1(3)       |
| O1          | C5          | C6          | 121.4(3)       | C32         | C31         | C23         | 123.6(3)       |
| C6          | C5          | C4          | 117.2(3)       | C32         | C31         | C36         | 117.4(3)       |
| C7          | C6          | C5          | 119.0(3)       | C36         | C31         | C23         | 118.5(3)       |
| C7          | C6          | C11         | 119.7(3)       | C33         | C32         | C31         | 121.5(3)       |
| C11         | C6          | C5          | 121.3(3)       | C34         | C33         | C32         | 119.9(3)       |
| C8          | C7          | C6          | 119.7(3)       | O4          | C34         | C33         | 124.5(3)       |
| C9          | C8          | C7          | 120.6(3)       | O4          | C34         | C35         | 116.0(3)       |
| C8          | C9          | C10         | 120.4(3)       | C33         | C34         | C35         | 119.5(3)       |
| C9          | C10         | C11         | 119.5(3)       | C36         | C35         | C34         | 120.3(3)       |
| C6          | C11         | C12         | 121.1(3)       | C35         | C36         | C31         | 121.4(3)       |
| C10         | C11         | C6          | 120.2(3)       | C16         | C38         | C39         | 124.1(3)       |
| C10         | C11         | C12         | 118.7(3)       | C16         | C38         | C46         | 120.6(2)       |
| O2          | C12         | C11         | 121.0(3)       | C39         | C38         | C46         | 115.3(2)       |
| O2          | C12         | C13         | 121.2(3)       | C40         | C39         | C38         | 123.4(3)       |
| C13         | C12         | C11         | 117.8(3)       | C40         | C39         | C44         | 116.7(3)       |
| C4          | C13         | C12         | 120.9(2)       | C44         | C39         | C38         | 119.8(3)       |
| C14         | C13         | C4          | 120.1(3)       | C39         | C40         | C41         | 121.9(3)       |
| C14         | C13         | C12         | 119.0(3)       | C42         | C41         | C40         | 119.3(3)       |
| C15         | C14         | C13         | 120.9(3)       | O5          | C42         | C41         | 125.0(3)       |
| C2          | C15         | C16         | 115.3(2)       | O5          | C42         | C43         | 115.2(3)       |
| C14         | C15         | C2          | 118.7(2)       | C43         | C42         | C41         | 119.7(3)       |
| C14         | C15         | C16         | 126.0(3)       | C44         | C43         | C42         | 120.1(3)       |
| C17         | C16         | C15         | 111.5(2)       | C43         | C44         | C39         | 122.3(3)       |
| C38         | C16         | C15         | 125.0(3)       | C47         | C46         | C38         | 122.7(3)       |

| <b>Atom</b> | <b>Atom</b> | <b>Atom</b> | <b>Angle/°</b> | <b>Atom</b> | <b>Atom</b> | <b>Atom</b> | <b>Angle/°</b> |
|-------------|-------------|-------------|----------------|-------------|-------------|-------------|----------------|
| C38         | C16         | C17         | 123.3 (2)      | C47         | C46         | C51         | 118.0 (3)      |
| C18         | C17         | C16         | 122.1 (3)      | C51         | C46         | C38         | 119.3 (3)      |
| C18         | C17         | C22         | 119.5 (3)      | C46         | C47         | C48         | 121.3 (3)      |
| C22         | C17         | C16         | 118.3 (3)      | C49         | C48         | C47         | 119.5 (3)      |
| C19         | C18         | C17         | 120.5 (3)      | O6          | C49         | C48         | 124.8 (3)      |
| C18         | C19         | C20         | 120.2 (3)      | O6          | C49         | C50         | 115.1 (3)      |
| C19         | C20         | C21         | 120.5 (3)      | C48         | C49         | C50         | 120.1 (3)      |
| C20         | C21         | C22         | 119.7 (3)      | C51         | C50         | C49         | 119.5 (3)      |
| C17         | C22         | C1          | 115.3 (3)      | C50         | C51         | C46         | 121.5 (3)      |

**Table S-5.** Selected Torsion Angles

| <b>A</b> | <b>B</b> | <b>C</b> | <b>D</b> | <b>Angle/°</b> | <b>A</b> | <b>B</b> | <b>C</b> | <b>D</b> | <b>Angle/°</b> |
|----------|----------|----------|----------|----------------|----------|----------|----------|----------|----------------|
| O1       | C5       | C6       | C7       | -0.6 (5)       | C17      | C16      | C38      | C46      | 171.4 (3)      |
| O1       | C5       | C6       | C11      | -179.7 (3)     | C17      | C18      | C19      | C20      | -0.4 (4)       |
| O2       | C12      | C13      | C4       | 176.4 (3)      | C18      | C17      | C22      | C1       | -179.1 (3)     |
| O2       | C12      | C13      | C14      | -3.5 (5)       | C18      | C17      | C22      | C21      | 0.3 (4)        |
| O3       | C27      | C28      | C29      | -178.4 (3)     | C18      | C19      | C20      | C21      | 0.5 (5)        |
| O4       | C34      | C35      | C36      | -179.8 (3)     | C19      | C20      | C21      | C22      | -0.2 (4)       |
| O5       | C42      | C43      | C44      | -179.4 (3)     | C20      | C21      | C22      | C1       | 179.2 (3)      |
| O6       | C49      | C50      | C51      | -178.5 (3)     | C20      | C21      | C22      | C17      | -0.2 (4)       |
| C1       | C2       | C3       | C4       | -176.3 (3)     | C22      | C1       | C2       | C3       | 135.0 (3)      |
| C1       | C2       | C15      | C14      | 177.0 (3)      | C22      | C1       | C2       | C15      | -41.7 (4)      |
| C1       | C2       | C15      | C16      | -1.6 (4)       | C22      | C1       | C23      | C24      | -2.1 (5)       |
| C1       | C23      | C24      | C25      | 71.2 (4)       | C22      | C1       | C23      | C31      | 162.9 (3)      |
| C1       | C23      | C24      | C29      | -113.1 (3)     | C22      | C17      | C18      | C19      | 0.0 (4)        |
| C1       | C23      | C31      | C32      | 128.0 (3)      | C23      | C1       | C2       | C3       | -49.9 (4)      |
| C1       | C23      | C31      | C36      | -59.9 (4)      | C23      | C1       | C2       | C15      | 133.4 (3)      |
| C2       | C1       | C22      | C17      | 43.0 (3)       | C23      | C1       | C22      | C17      | -131.9 (3)     |
| C2       | C1       | C22      | C21      | -136.4 (3)     | C23      | C1       | C22      | C21      | 48.7 (4)       |
| C2       | C1       | C23      | C24      | -176.5 (3)     | C23      | C24      | C25      | C26      | 177.3 (3)      |
| C2       | C1       | C23      | C31      | -11.5 (4)      | C23      | C24      | C29      | C28      | -176.2 (3)     |
| C2       | C3       | C4       | C5       | 177.4 (3)      | C23      | C31      | C32      | C33      | 172.8 (3)      |
| C2       | C3       | C4       | C13      | -0.3 (4)       | C23      | C31      | C36      | C35      | -173.2 (3)     |
| C2       | C15      | C16      | C17      | 42.3 (3)       | C24      | C23      | C31      | C32      | -65.9 (4)      |
| C2       | C15      | C16      | C38      | -132.6 (3)     | C24      | C23      | C31      | C36      | 106.1 (3)      |
| C3       | C2       | C15      | C14      | 0.2 (4)        | C24      | C25      | C26      | C27      | -0.8 (5)       |
| C3       | C2       | C15      | C16      | -178.3 (3)     | C25      | C24      | C29      | C28      | -0.5 (5)       |
| C3       | C4       | C5       | O1       | 1.9 (5)        | C25      | C26      | C27      | O3       | 179.3 (3)      |
| C3       | C4       | C5       | C6       | -178.2 (3)     | C25      | C26      | C27      | C28      | -0.8 (5)       |
| C3       | C4       | C13      | C12      | 179.8 (3)      | C26      | C27      | C28      | C29      | 1.6 (5)        |
| C3       | C4       | C13      | C14      | -0.3 (4)       | C27      | C28      | C29      | C24      | -1.0 (5)       |
| C4       | C5       | C6       | C7       | 179.6 (3)      | C29      | C24      | C25      | C26      | 1.4 (5)        |
| C4       | C5       | C6       | C11      | 0.5 (4)        | C30      | O3       | C27      | C26      | 174.0 (3)      |
| C4       | C13      | C14      | C15      | 0.9 (4)        | C30      | O3       | C27      | C28      | -6.0 (4)       |
| C5       | C4       | C13      | C12      | 2.1 (4)        | C31      | C23      | C24      | C25      | -94.9 (3)      |
| C5       | C4       | C13      | C14      | -178.0 (3)     | C31      | C23      | C24      | C29      | 80.8 (4)       |
| C5       | C6       | C7       | C8       | -178.5 (3)     | C31      | C32      | C33      | C34      | 0.3 (4)        |
| C5       | C6       | C11      | C10      | 177.9 (3)      | C32      | C31      | C36      | C35      | -0.7 (4)       |
| C5       | C6       | C11      | C12      | -2.1 (4)       | C32      | C33      | C34      | O4       | 179.9 (3)      |
| C6       | C7       | C8       | C9       | 0.6 (5)        | C32      | C33      | C34      | C35      | -1.2 (4)       |
| C6       | C11      | C12      | O2       | -176.4 (3)     | C33      | C34      | C35      | C36      | 1.2 (4)        |

| <b>A</b> | <b>B</b> | <b>C</b> | <b>D</b> | <b>Angle/°</b> | <b>A</b> | <b>B</b> | <b>C</b> | <b>D</b> | <b>Angle/°</b> |
|----------|----------|----------|----------|----------------|----------|----------|----------|----------|----------------|
| C6       | C11      | C12      | C13      | 3.5 (4)        | C34      | C35      | C36      | C31      | -0.2 (5)       |
| C7       | C6       | C11      | C10      | -1.1 (5)       | C36      | C31      | C32      | C33      | 0.6 (4)        |
| C7       | C6       | C11      | C12      | 178.9 (3)      | C37      | O4       | C34      | C33      | -10.5 (5)      |
| C7       | C8       | C9       | C10      | -1.3 (6)       | C37      | O4       | C34      | C35      | 170.5 (3)      |
| C8       | C9       | C10      | C11      | 0.7 (5)        | C38      | C16      | C17      | C18      | -48.9 (4)      |
| C9       | C10      | C11      | C6       | 0.4 (5)        | C38      | C16      | C17      | C22      | 133.9 (3)      |
| C9       | C10      | C11      | C12      | -179.5 (3)     | C38      | C39      | C40      | C41      | -177.1 (3)     |
| C10      | C11      | C12      | O2       | 3.6 (5)        | C38      | C39      | C44      | C43      | 177.7 (3)      |
| C10      | C11      | C12      | C13      | -176.5 (3)     | C38      | C46      | C47      | C48      | -177.5 (3)     |
| C11      | C6       | C7       | C8       | 0.6 (5)        | C38      | C46      | C51      | C50      | 177.9 (3)      |
| C11      | C12      | C13      | C4       | -3.5 (4)       | C39      | C38      | C46      | C47      | -83.6 (3)      |
| C11      | C12      | C13      | C14      | 176.6 (3)      | C39      | C38      | C46      | C51      | 96.6 (3)       |
| C12      | C13      | C14      | C15      | -179.2 (3)     | C39      | C40      | C41      | C42      | -0.2 (5)       |
| C13      | C4       | C5       | O1       | 179.6 (3)      | C40      | C39      | C44      | C43      | 1.0 (5)        |
| C13      | C4       | C5       | C6       | -0.5 (4)       | C40      | C41      | C42      | O5       | 179.7 (3)      |
| C13      | C14      | C15      | C2       | -0.9 (4)       | C40      | C41      | C42      | C43      | 0.6 (5)        |
| C13      | C14      | C15      | C16      | 177.5 (3)      | C41      | C42      | C43      | C44      | -0.2 (5)       |
| C14      | C15      | C16      | C17      | -136.1 (3)     | C42      | C43      | C44      | C39      | -0.7 (5)       |
| C14      | C15      | C16      | C38      | 49.0 (5)       | C44      | C39      | C40      | C41      | -0.6 (4)       |
| C15      | C2       | C3       | C4       | 0.4 (4)        | C45      | O5       | C42      | C41      | 7.8 (5)        |
| C15      | C16      | C17      | C18      | 136.1 (3)      | C45      | O5       | C42      | C43      | -173.0 (3)     |
| C15      | C16      | C17      | C22      | -41.1 (3)      | C46      | C38      | C39      | C40      | 140.8 (3)      |
| C15      | C16      | C38      | C39      | 164.1 (3)      | C46      | C38      | C39      | C44      | -35.6 (4)      |
| C15      | C16      | C38      | C46      | -14.3 (5)      | C46      | C47      | C48      | C49      | -0.7 (5)       |
| C16      | C17      | C18      | C19      | -177.2 (3)     | C47      | C46      | C51      | C50      | -1.9 (4)       |
| C16      | C17      | C22      | C1       | -1.9 (4)       | C47      | C48      | C49      | O6       | 178.8 (3)      |
| C16      | C17      | C22      | C21      | 177.6 (3)      | C47      | C48      | C49      | C50      | -1.3 (5)       |
| C16      | C38      | C39      | C40      | -37.6 (4)      | C48      | C49      | C50      | C51      | 1.6 (5)        |
| C16      | C38      | C39      | C44      | 146.0 (3)      | C49      | C50      | C51      | C46      | 0.1 (5)        |
| C16      | C38      | C46      | C47      | 94.9 (4)       | C51      | C46      | C47      | C48      | 2.2 (4)        |
| C16      | C38      | C46      | C51      | -84.9 (4)      | C52      | O6       | C49      | C48      | -1.5 (5)       |
| C17      | C16      | C38      | C39      | -10.2 (5)      | C52      | O6       | C49      | C50      | 178.5 (3)      |

## 2. Crystallographic Data and Detailed Refinements for 5c

**Table S-6.** Crystal data and structure refinement

|                                                |                                                                 |
|------------------------------------------------|-----------------------------------------------------------------|
| Identification code                            | Ey-pyrene                                                       |
| Empirical formula                              | $C_{108.85}H_{90.7}Cl_{0.7}O_{3.75}$                            |
| Formula weight                                 | 1483.52                                                         |
| Temperature/K                                  | 100(2)                                                          |
| Crystal system                                 | triclinic                                                       |
| Space group                                    | <i>P</i> -1                                                     |
| <i>a</i> /Å                                    | 13.5911(3)                                                      |
| <i>b</i> /Å                                    | 14.1632(4)                                                      |
| <i>c</i> /Å                                    | 23.9764(6)                                                      |
| $\alpha$ /°                                    | 94.222(2)                                                       |
| $\beta$ /°                                     | 93.435(2)                                                       |
| $\gamma$ /°                                    | 106.380(2)                                                      |
| Volume/Å <sup>3</sup>                          | 4400.2(2)                                                       |
| <i>Z</i>                                       | 2                                                               |
| $\rho_{\text{calc}}$ /g/cm <sup>3</sup>        | 1.120                                                           |
| $\mu$ /mm <sup>-1</sup>                        | 0.698                                                           |
| <i>F</i> (000)                                 | 1571.0                                                          |
| Crystal size/mm <sup>3</sup>                   | 0.395 × 0.088 × 0.074                                           |
| Radiation                                      | Cu <i>K</i> α ( $\lambda$ = 1.54184)                            |
| 2 $\theta$ range for data collection/°         | 6.534 to 159.038                                                |
| Index ranges                                   | -17 ≤ <i>h</i> ≤ 16, -18 ≤ <i>k</i> ≤ 18, -30 ≤ <i>l</i> ≤ 30   |
| Reflections collected                          | 100508                                                          |
| Independent reflections                        | 18467 [ $R_{\text{int}}$ = 0.0499, $R_{\text{sigma}}$ = 0.0330] |
| Data/restraints/parameters                     | 18467/789/1247                                                  |
| Goodness-of-fit on <i>F</i> <sup>2</sup>       | 1.269                                                           |
| Final <i>R</i> indexes [ $I \geq 2\sigma(I)$ ] | $R_1 = 0.1026$ , $wR_2 = 0.3072$                                |
| Final <i>R</i> indexes [all data]              | $R_1 = 0.1345$ , $wR_2 = 0.3434$                                |
| Largest diff. peak/hole / e Å <sup>-3</sup>    | 0.61/-0.43                                                      |

**Table S-7.** Fractional Atomic Coordinates ( $\times 10^4$ ) and Equivalent Isotropic Displacement Parameters $(\text{\AA}^2 \times 10^3)$ .  $U_{\text{eq}}$  is defined as 1/3 of the trace of the orthogonalised  $U_{ij}$  tensor.

| Atom | <i>x</i>    | <i>y</i>    | <i>z</i>    | $U(\text{eq})$ |
|------|-------------|-------------|-------------|----------------|
| O1   | 3691.4 (15) | 6946.6 (15) | 4897.8 (8)  | 67.3 (5)       |
| O2   | 6922.2 (15) | 5461.6 (16) | 4926.3 (8)  | 67.4 (5)       |
| C1   | 4447 (2)    | 6647.2 (19) | 4904.8 (11) | 58.9 (6)       |
| C2   | 5062 (2)    | 6638.3 (19) | 5439.1 (11) | 59.8 (6)       |
| C3   | 4789 (3)    | 7008 (2)    | 5941.1 (11) | 68.3 (7)       |
| C4   | 5352 (3)    | 7019 (2)    | 6437.5 (12) | 72.4 (7)       |
| C5   | 6199 (3)    | 6649 (2)    | 6443.2 (12) | 70.5 (7)       |
| C6   | 6477 (2)    | 6266 (2)    | 5954.6 (11) | 64.9 (6)       |
| C7   | 5915 (2)    | 6265.8 (19) | 5444.0 (11) | 58.7 (6)       |
| C8   | 6222 (2)    | 5851 (2)    | 4916.0 (10) | 57.2 (6)       |
| C9   | 5664 (2)    | 5928.6 (19) | 4379.4 (10) | 56.6 (6)       |
| C10  | 5961 (2)    | 5577 (2)    | 3878.8 (10) | 57.3 (6)       |
| C11  | 5444 (2)    | 5611 (2)    | 3368.9 (10) | 57.5 (6)       |
| C12  | 5663 (2)    | 5176 (2)    | 2820.6 (10) | 61.1 (6)       |
| C13  | 4705 (2)    | 4696 (2)    | 2452.7 (10) | 58.7 (6)       |
| C14  | 4534 (2)    | 3772 (2)    | 2155.0 (10) | 62.4 (6)       |
| C15  | 3621 (2)    | 3332 (2)    | 1830.4 (11) | 66.9 (7)       |
| C16  | 2870 (2)    | 3828 (2)    | 1790.2 (11) | 67.6 (7)       |
| C17  | 3031 (2)    | 4741 (2)    | 2084.1 (11) | 62.6 (6)       |
| C18  | 3926 (2)    | 5177 (2)    | 2424.4 (10) | 58.2 (6)       |
| C19  | 4098 (2)    | 6097 (2)    | 2806.7 (10) | 57.7 (6)       |
| C20  | 4614 (2)    | 6027.4 (19) | 3363.2 (10) | 57.6 (6)       |
| C21  | 4295 (2)    | 6342.1 (19) | 3864.0 (10) | 57.4 (6)       |
| C22  | 4814 (2)    | 6302.1 (18) | 4373.6 (10) | 56.3 (6)       |
| C23  | 6611 (2)    | 5232 (2)    | 2655.1 (11) | 67.4 (7)       |
| C24  | 7608 (2)    | 5769 (2)    | 2993.0 (12) | 66.8 (7)       |
| C25  | 8072 (2)    | 6742 (3)    | 2900.5 (13) | 73.3 (8)       |
| C26  | 9045 (3)    | 7248 (3)    | 3158.5 (14) | 77.5 (8)       |
| C27  | 9592 (2)    | 6805 (2)    | 3499.8 (13) | 72.9 (8)       |
| C28  | 10619 (3)   | 7299 (3)    | 3751.0 (14) | 79.3 (8)       |
| C29  | 11133 (3)   | 6822 (3)    | 4069.9 (15) | 81.9 (9)       |
| C30  | 10699 (2)   | 5809 (3)    | 4177.6 (13) | 73.5 (8)       |
| C31  | 11232 (3)   | 5313 (3)    | 4504.2 (15) | 84.7 (9)       |
| C32  | 10783 (3)   | 4352 (3)    | 4616.0 (17) | 88.7 (10)      |
| C33  | 9783 (3)    | 3867 (3)    | 4394.8 (15) | 84.1 (9)       |
| C34  | 9225 (2)    | 4328 (3)    | 4059.0 (14) | 75.6 (8)       |
| C35  | 8202 (2)    | 3834 (3)    | 3819.5 (13) | 73.3 (8)       |

| Atom | <i>x</i>  | <i>y</i>  | <i>z</i>    | U(eq)      |
|------|-----------|-----------|-------------|------------|
| C36  | 7685 (2)  | 4291 (2)  | 3480.1 (13) | 70.9 (7)   |
| C37  | 8128 (2)  | 5289 (2)  | 3348.8 (11) | 62.2 (6)   |
| C38  | 9130 (2)  | 5802 (2)  | 3599.3 (12) | 69.1 (7)   |
| C39  | 9684 (2)  | 5314 (3)  | 3944.4 (12) | 71.6 (8)   |
| C40  | 6785 (2)  | 4830 (3)  | 2081.6 (12) | 72.0 (7)   |
| C41  | 7266 (3)  | 4081 (3)  | 2039.5 (14) | 82.3 (9)   |
| C42  | 7458 (3)  | 3669 (3)  | 1529.7 (15) | 89.7 (10)  |
| C43  | 7194 (3)  | 4026 (3)  | 1034.4 (15) | 88.0 (10)  |
| C44  | 7380 (3)  | 3630 (4)  | 493.0 (17)  | 101.3 (12) |
| C45  | 7169 (3)  | 4022 (4)  | 26.2 (17)   | 107.5 (14) |
| C46  | 6744 (3)  | 4828 (4)  | 34.8 (14)   | 96.3 (12)  |
| C47  | 6529 (3)  | 5253 (4)  | -445.2 (16) | 111.8 (15) |
| C48  | 6107 (3)  | 6019 (5)  | -423.6 (16) | 120.0 (18) |
| C49  | 5897 (3)  | 6431 (4)  | 86.2 (15)   | 106.0 (14) |
| C50  | 6103 (3)  | 6036 (4)  | 583.5 (14)  | 92.3 (11)  |
| C51  | 5879 (3)  | 6418 (3)  | 1118.3 (13) | 83.6 (9)   |
| C52  | 6092 (2)  | 6037 (3)  | 1593.3 (13) | 75.9 (8)   |
| C53  | 6534 (2)  | 5225 (3)  | 1592.3 (12) | 72.1 (8)   |
| C54  | 6746 (2)  | 4825 (3)  | 1063.2 (12) | 78.9 (9)   |
| C55  | 6529 (3)  | 5235 (3)  | 562.3 (13)  | 84.0 (9)   |
| C56  | 3864 (2)  | 6921 (2)  | 2686.9 (11) | 62.0 (6)   |
| C57  | 3441 (2)  | 7116 (2)  | 2126.8 (11) | 61.6 (6)   |
| C58  | 4147 (2)  | 7620 (2)  | 1771.5 (12) | 68.0 (7)   |
| C59  | 3830 (2)  | 7951 (2)  | 1287.4 (12) | 70.0 (7)   |
| C60  | 2791 (2)  | 7834 (2)  | 1141.0 (12) | 67.5 (7)   |
| C61  | 2442 (3)  | 8221 (3)  | 657.4 (13)  | 77.8 (8)   |
| C62  | 1445 (3)  | 8112 (3)  | 531.6 (15)  | 85.0 (9)   |
| C63  | 675 (3)   | 7606 (3)  | 877.6 (14)  | 80.1 (8)   |
| C64  | -373 (3)  | 7478 (3)  | 758.3 (17)  | 94.2 (11)  |
| C65  | -1092 (3) | 6979 (4)  | 1091.7 (19) | 99.9 (12)  |
| C66  | -790 (3)  | 6581 (3)  | 1558.4 (17) | 90.4 (10)  |
| C67  | 249 (2)   | 6690 (2)  | 1701.1 (14) | 74.1 (8)   |
| C68  | 594 (2)   | 6307 (2)  | 2188.8 (13) | 73.6 (8)   |
| C69  | 1603 (2)  | 6442 (2)  | 2327.5 (12) | 68.6 (7)   |
| C70  | 2382 (2)  | 6956 (2)  | 1986.8 (11) | 61.2 (6)   |
| C71  | 2057 (2)  | 7324 (2)  | 1493.3 (11) | 63.8 (6)   |
| C72  | 997 (2)   | 7203 (2)  | 1358.6 (12) | 70.4 (7)   |
| C73  | 4091 (3)  | 7820 (2)  | 3100.0 (12) | 72.8 (8)   |
| C74  | 3254 (3)  | 8094 (3)  | 3311.1 (13) | 80.1 (9)   |
| C75  | 3392 (4)  | 8885 (3)  | 3704.5 (15) | 93.1 (11)  |
| C76  | 4295 (6)  | 9455 (11) | 3903 (7)    | 78 (3)     |

| <b>Atom</b> | <b>x</b>  | <b>y</b>   | <b>z</b>    | <b>U(eq)</b> |
|-------------|-----------|------------|-------------|--------------|
| C76A        | 4465 (11) | 9458 (11)  | 3882 (8)    | 97 (4)       |
| C77         | 4416 (8)  | 10269 (12) | 4312 (8)    | 81 (2)       |
| C77A        | 4767 (19) | 10289 (14) | 4308 (9)    | 108 (4)      |
| C78         | 5363 (9)  | 10802 (10) | 4518 (7)    | 81 (3)       |
| C78A        | 5750 (20) | 10831 (15) | 4445 (9)    | 121 (5)      |
| C79         | 6266 (8)  | 10673 (10) | 4295 (6)    | 82 (2)       |
| C79A        | 6620 (18) | 10629 (12) | 4236 (10)   | 115 (4)      |
| C80         | 7222 (10) | 11229 (11) | 4478 (8)    | 109 (3)      |
| C80A        | 7610 (20) | 11160 (15) | 4360 (11)   | 142 (6)      |
| C81         | 8118 (8)  | 11055 (10) | 4295 (7)    | 111 (4)      |
| C81A        | 8435 (19) | 10930 (17) | 4131 (13)   | 161 (6)      |
| C82         | 8019 (7)  | 10256 (10) | 3885 (7)    | 107 (4)      |
| C82A        | 8278 (16) | 10147 (17) | 3694 (13)   | 156 (6)      |
| C83         | 7022 (7)  | 9658 (12)  | 3672 (7)    | 86 (3)       |
| C83A        | 7226 (14) | 9563 (17)  | 3561 (12)   | 119 (4)      |
| C84         | 6918 (7)  | 8787 (11)  | 3281 (6)    | 80 (3)       |
| C84A        | 6976 (12) | 8745 (17)  | 3112 (11)   | 111 (5)      |
| C85         | 5984 (8)  | 8201 (10)  | 3081 (7)    | 86 (3)       |
| C85A        | 5987 (9)  | 8183 (13)  | 3024 (9)    | 91 (4)       |
| C86         | 5081 (3)  | 8392 (2)   | 3269.3 (13) | 75.9 (8)     |
| C87         | 5160 (7)  | 9227 (11)  | 3690 (6)    | 72 (2)       |
| C87A        | 5369 (12) | 9247 (12)  | 3663 (9)    | 94 (4)       |
| C88         | 6158 (6)  | 9823 (9)   | 3891 (6)    | 73 (2)       |
| C88A        | 6408 (15) | 9808 (14)  | 3794 (10)   | 115 (4)      |
| O3          | 1065 (6)  | 3774 (7)   | 3059 (3)    | 221 (3)      |
| C102        | 1060 (8)  | 2699 (8)   | 3015 (6)    | 222 (5)      |
| C103        | -56 (9)   | 2143 (8)   | 2907 (6)    | 235 (5)      |
| C104        | -543 (8)  | 2763 (8)   | 2565 (5)    | 211 (4)      |
| C105        | 142 (8)   | 3763 (6)   | 2679 (3)    | 169 (3)      |
| O4          | 7547 (5)  | 8505 (5)   | 4899 (2)    | 174 (2)      |
| Cl3         | 9430 (15) | 9266 (18)  | 5179 (9)    | 262 (7)      |
| Cl4         | 7903 (15) | 9054 (16)  | 5978 (9)    | 262 (7)      |
| C107        | 8198 (5)  | 8018 (5)   | 4520 (3)    | 128.0 (18)   |
| C108        | 9122 (7)  | 8066 (9)   | 4854 (3)    | 190 (4)      |
| C109        | 8765 (9)  | 8030 (11)  | 5429 (4)    | 212 (4)      |
| C110        | 8138 (8)  | 8709 (8)   | 5463 (3)    | 183 (3)      |
| C111        | 8741 (18) | 9895 (15)  | 5597 (10)   | 107 (8)      |
| Cl1         | 9760 (30) | 11120 (20) | 2829 (14)   | 238 (8)      |
| Cl2         | 8080 (20) | 11880 (20) | 2552 (13)   | 238 (8)      |
| C106        | 9300 (30) | 12170 (20) | 2930 (20)   | 119 (14)     |
| Cl5         | 8100 (50) | 10910 (30) | 1260 (30)   | 380 (30)     |



| <b>Atom</b> | <b><i>x</i></b> | <b><i>y</i></b> | <b><i>z</i></b> | <b>U(eq)</b> |
|-------------|-----------------|-----------------|-----------------|--------------|
| C16         | 7540 (30)       | 8960 (20)       | 1706 (13)       | 234 (12)     |
| C118        | 7400 (60)       | 9640 (30)       | 1130 (20)       | 230 (30)     |
| C89         | 387 (5)         | 4142 (6)        | 1144 (3)        | 145 (2)      |
| C90         | 304 (4)         | 4149 (5)        | 544 (2)         | 130.1 (18)   |
| C91         | 77 (4)          | 4992 (5)        | 298 (2)         | 126.5 (18)   |
| C92         | 4842 (5)        | 10375 (5)       | 158 (3)         | 146 (2)      |
| C93         | 5222 (15)       | 11319 (11)      | 394 (6)         | 141 (3)      |
| C94         | 5259 (11)       | 10832 (8)       | 716 (4)         | 141 (3)      |
| C95         | 4872 (7)        | 11736 (6)       | 893 (3)         | 168 (3)      |
| C96         | 6189 (11)       | 11389 (8)       | 2638 (5)        | 185 (4)      |
| C97         | 5252 (15)       | 10609 (8)       | 2394 (4)        | 192 (6)      |
| C98         | 4288 (18)       | 10741 (7)       | 2515 (4)        | 221 (8)      |
| C99         | 3270 (15)       | 9992 (7)        | 2307 (4)        | 211 (7)      |
| C100        | 2328 (15)       | 10161 (10)      | 2462 (6)        | 224 (7)      |
| C101        | 1350 (11)       | 9343 (8)        | 2402 (5)        | 198 (5)      |
| C112        | 7435 (18)       | 9240 (15)       | 1184 (14)       | 311 (16)     |
| C113        | 8204 (18)       | 10150 (20)      | 1008 (14)       | 315 (13)     |
| C114        | 9298 (16)       | 10140 (20)      | 1183 (12)       | 312 (12)     |
| C115        | 10000 (14)      | 10890 (17)      | 847 (8)         | 243 (8)      |
| C116        | 11110 (16)      | 10940 (20)      | 1037 (11)       | 282 (11)     |
| C117        | 11714 (14)      | 11524 (17)      | 605 (9)         | 237 (9)      |

**Table S-8.** Selected Bond Distances (Å)

| <b>Atom</b> | <b>Atom</b> | <b>Length/Å</b> | <b>Atom</b> | <b>Atom</b> | <b>Length/Å</b> |
|-------------|-------------|-----------------|-------------|-------------|-----------------|
| O1          | C1          | 1.217 (3)       | C63         | C72         | 1.422 (5)       |
| O2          | C8          | 1.228 (3)       | C64         | C65         | 1.371 (6)       |
| C1          | C2          | 1.490 (4)       | C65         | C66         | 1.381 (6)       |
| C1          | C22         | 1.494 (3)       | C66         | C67         | 1.394 (5)       |
| C2          | C3          | 1.389 (4)       | C67         | C68         | 1.433 (5)       |
| C2          | C7          | 1.403 (4)       | C67         | C72         | 1.417 (5)       |
| C3          | C4          | 1.372 (4)       | C68         | C69         | 1.348 (4)       |
| C4          | C5          | 1.394 (4)       | C69         | C70         | 1.440 (4)       |
| C5          | C6          | 1.372 (4)       | C70         | C71         | 1.423 (4)       |
| C6          | C7          | 1.403 (4)       | C71         | C72         | 1.417 (4)       |
| C7          | C8          | 1.487 (3)       | C73         | C74         | 1.411 (5)       |
| C8          | C9          | 1.481 (4)       | C73         | C86         | 1.380 (5)       |
| C9          | C10         | 1.391 (3)       | C74         | C75         | 1.372 (5)       |
| C9          | C22         | 1.399 (4)       | C75         | C76         | 1.303 (9)       |
| C10         | C11         | 1.384 (4)       | C75         | C76A        | 1.475 (13)      |
| C11         | C12         | 1.492 (3)       | C76         | C77         | 1.423 (10)      |
| C11         | C20         | 1.413 (4)       | C76         | C87         | 1.419 (9)       |
| C12         | C13         | 1.486 (4)       | C76A        | C77A        | 1.447 (11)      |
| C12         | C23         | 1.354 (4)       | C76A        | C87A        | 1.461 (13)      |
| C13         | C14         | 1.395 (4)       | C77         | C78         | 1.338 (11)      |
| C13         | C18         | 1.412 (4)       | C77A        | C78A        | 1.342 (15)      |
| C14         | C15         | 1.382 (4)       | C78         | C79         | 1.419 (11)      |
| C15         | C16         | 1.396 (4)       | C78A        | C79A        | 1.410 (16)      |
| C16         | C17         | 1.380 (4)       | C79         | C80         | 1.344 (12)      |
| C17         | C18         | 1.383 (4)       | C79         | C88         | 1.455 (10)      |
| C18         | C19         | 1.490 (4)       | C79A        | C80A        | 1.342 (15)      |
| C19         | C20         | 1.493 (3)       | C79A        | C88A        | 1.466 (13)      |
| C19         | C56         | 1.340 (4)       | C80         | C81         | 1.400 (13)      |
| C20         | C21         | 1.386 (3)       | C80A        | C81A        | 1.389 (19)      |
| C21         | C22         | 1.387 (4)       | C81         | C82         | 1.414 (13)      |
| C23         | C24         | 1.506 (4)       | C81A        | C82A        | 1.429 (17)      |
| C23         | C40         | 1.507 (4)       | C82         | C83         | 1.420 (10)      |
| C24         | C25         | 1.385 (5)       | C82A        | C83A        | 1.438 (14)      |
| C24         | C37         | 1.405 (4)       | C83         | C84         | 1.461 (10)      |
| C25         | C26         | 1.395 (5)       | C83         | C88         | 1.387 (10)      |
| C26         | C27         | 1.373 (5)       | C83A        | C84A        | 1.472 (14)      |
| C27         | C28         | 1.444 (5)       | C83A        | C88A        | 1.391 (15)      |
| C27         | C38         | 1.427 (5)       | C84         | C85         | 1.343 (10)      |
| C28         | C29         | 1.345 (5)       | C84A        | C85A        | 1.351 (13)      |

| Atom | Atom | Length/Å  | Atom | Atom             | Length/Å   |
|------|------|-----------|------|------------------|------------|
| C29  | C30  | 1.438 (5) | C85  | C86              | 1.420 (10) |
| C30  | C31  | 1.390 (5) | C85A | C86              | 1.488 (13) |
| C30  | C39  | 1.419 (4) | C86  | C87              | 1.472 (9)  |
| C31  | C32  | 1.379 (6) | C86  | C87A             | 1.426 (10) |
| C32  | C33  | 1.391 (5) | C87  | C88              | 1.414 (9)  |
| C33  | C34  | 1.390 (5) | C87A | C88A             | 1.414 (13) |
| C34  | C35  | 1.432 (5) | O3   | C102             | 1.516 (10) |
| C34  | C39  | 1.414 (5) | O3   | C105             | 1.501 (9)  |
| C35  | C36  | 1.357 (4) | C102 | C103             | 1.495 (10) |
| C36  | C37  | 1.437 (4) | C103 | C104             | 1.500 (10) |
| C37  | C38  | 1.422 (4) | C104 | C105             | 1.455 (10) |
| C38  | C39  | 1.425 (5) | O4   | C107             | 1.560 (8)  |
| C40  | C41  | 1.396 (5) | O4   | C110             | 1.496 (9)  |
| C40  | C53  | 1.400 (5) | Cl3  | Cl3 <sup>1</sup> | 2.46 (6)   |
| C41  | C42  | 1.386 (4) | Cl3  | C111             | 1.767 (9)  |
| C42  | C43  | 1.391 (6) | Cl4  | C111             | 1.752 (9)  |
| C43  | C44  | 1.441 (4) | C107 | C108             | 1.430 (8)  |
| C43  | C54  | 1.426 (5) | C108 | C109             | 1.489 (9)  |
| C44  | C45  | 1.336 (7) | C109 | C110             | 1.455 (10) |
| C45  | C46  | 1.417 (7) | Cl1  | C106             | 1.778 (9)  |
| C46  | C47  | 1.390 (6) | Cl2  | C106             | 1.771 (9)  |
| C46  | C55  | 1.432 (5) | Cl5  | C118             | 1.775 (9)  |
| C47  | C48  | 1.362 (8) | Cl6  | C118             | 1.768 (9)  |
| C48  | C49  | 1.395 (6) | C89  | C90              | 1.437 (8)  |
| C49  | C50  | 1.400 (5) | C90  | C91              | 1.469 (8)  |
| C50  | C51  | 1.439 (5) | C91  | C91 <sup>2</sup> | 1.434 (10) |
| C50  | C55  | 1.410 (6) | C92  | C92 <sup>3</sup> | 1.437 (11) |
| C51  | C52  | 1.347 (5) | C92  | C93              | 1.356 (16) |
| C52  | C53  | 1.439 (5) | C92  | C94              | 1.451 (11) |
| C53  | C54  | 1.430 (4) | C93  | C95              | 1.459 (14) |
| C54  | C55  | 1.423 (5) | C94  | C95              | 1.557 (12) |
| C56  | C57  | 1.504 (4) | C96  | C97              | 1.484 (17) |
| C56  | C73  | 1.501 (4) | C97  | C98              | 1.42 (2)   |
| C57  | C58  | 1.399 (4) | C98  | C99              | 1.52 (2)   |
| C57  | C70  | 1.408 (4) | C99  | C100             | 1.43 (2)   |
| C58  | C59  | 1.373 (4) | C100 | C101             | 1.49 (2)   |
| C59  | C60  | 1.395 (4) | C112 | C113             | 1.518 (13) |
| C60  | C61  | 1.429 (4) | C113 | C114             | 1.525 (13) |
| C60  | C71  | 1.419 (4) | C114 | C115             | 1.530 (13) |
| C61  | C62  | 1.333 (5) | C115 | C116             | 1.529 (12) |
| C62  | C63  | 1.437 (5) | C116 | C117             | 1.505 (13) |

| Atom | Atom | Length/Å  | Atom | Atom | Length/Å |
|------|------|-----------|------|------|----------|
| C63  | C64  | 1.393 (5) |      |      |          |

<sup>1</sup>2-X,2-Y,1-Z; <sup>2</sup>-X,1-Y,-Z; <sup>3</sup>1-X,2-Y,-Z

**Table S-9.** Selected Bond Angles

| Atom | Atom | Atom | Angle/°  | Atom | Atom | Atom | Angle/°   |
|------|------|------|----------|------|------|------|-----------|
| O1   | C1   | C2   | 121.6(2) | C58  | C57  | C70  | 119.0(2)  |
| O1   | C1   | C22  | 121.1(2) | C70  | C57  | C56  | 122.9(2)  |
| C2   | C1   | C22  | 117.3(2) | C59  | C58  | C57  | 121.6(3)  |
| C3   | C2   | C1   | 119.5(2) | C58  | C59  | C60  | 121.3(3)  |
| C3   | C2   | C7   | 119.4(2) | C59  | C60  | C61  | 122.6(3)  |
| C7   | C2   | C1   | 121.1(2) | C59  | C60  | C71  | 118.3(3)  |
| C4   | C3   | C2   | 120.6(3) | C71  | C60  | C61  | 119.1(3)  |
| C3   | C4   | C5   | 120.2(3) | C62  | C61  | C60  | 121.4(3)  |
| C6   | C5   | C4   | 120.5(3) | C61  | C62  | C63  | 121.5(3)  |
| C5   | C6   | C7   | 119.7(3) | C64  | C63  | C62  | 123.0(3)  |
| C2   | C7   | C6   | 119.7(2) | C64  | C63  | C72  | 118.5(3)  |
| C2   | C7   | C8   | 120.9(2) | C72  | C63  | C62  | 118.5(3)  |
| C6   | C7   | C8   | 119.4(2) | C65  | C64  | C63  | 121.8(4)  |
| O2   | C8   | C7   | 120.7(2) | C64  | C65  | C66  | 120.3(4)  |
| O2   | C8   | C9   | 121.1(2) | C65  | C66  | C67  | 120.6(4)  |
| C9   | C8   | C7   | 118.2(2) | C66  | C67  | C68  | 122.2(3)  |
| C10  | C9   | C8   | 119.1(2) | C66  | C67  | C72  | 119.5(3)  |
| C10  | C9   | C22  | 120.0(2) | C72  | C67  | C68  | 118.3(3)  |
| C22  | C9   | C8   | 120.8(2) | C69  | C68  | C67  | 121.4(3)  |
| C11  | C10  | C9   | 121.1(2) | C68  | C69  | C70  | 121.7(3)  |
| C10  | C11  | C12  | 124.1(2) | C57  | C70  | C69  | 122.7(2)  |
| C10  | C11  | C20  | 118.7(2) | C57  | C70  | C71  | 119.3(2)  |
| C20  | C11  | C12  | 117.1(2) | C71  | C70  | C69  | 118.0(3)  |
| C13  | C12  | C11  | 112.0(2) | C60  | C71  | C70  | 120.5(3)  |
| C23  | C12  | C11  | 125.4(3) | C72  | C71  | C60  | 119.6(3)  |
| C23  | C12  | C13  | 122.6(2) | C72  | C71  | C70  | 119.9(3)  |
| C14  | C13  | C12  | 122.3(2) | C67  | C72  | C63  | 119.4(3)  |
| C14  | C13  | C18  | 119.1(2) | C67  | C72  | C71  | 120.7(3)  |
| C18  | C13  | C12  | 118.5(2) | C71  | C72  | C63  | 120.0(3)  |
| C15  | C14  | C13  | 120.9(2) | C74  | C73  | C56  | 118.2(3)  |
| C14  | C15  | C16  | 119.5(3) | C86  | C73  | C56  | 122.4(3)  |
| C17  | C16  | C15  | 120.0(3) | C86  | C73  | C74  | 119.4(3)  |
| C16  | C17  | C18  | 121.1(3) | C75  | C74  | C73  | 122.0(4)  |
| C13  | C18  | C19  | 116.6(2) | C74  | C75  | C76A | 116.5(6)  |
| C17  | C18  | C13  | 119.3(2) | C76  | C75  | C74  | 123.4(6)  |
| C17  | C18  | C19  | 123.9(2) | C75  | C76  | C77  | 122.2(7)  |
| C18  | C19  | C20  | 111.9(2) | C75  | C76  | C87  | 116.5(8)  |
| C56  | C19  | C18  | 126.8(2) | C87  | C76  | C77  | 121.2(7)  |
| C56  | C19  | C20  | 121.4(2) | C77A | C76A | C75  | 124.6(11) |

| Atom | Atom | Atom | Angle/°  | Atom | Atom | Atom | Angle/°   |
|------|------|------|----------|------|------|------|-----------|
| C11  | C20  | C19  | 117.8(2) | C77A | C76A | C87A | 110.8(11) |
| C21  | C20  | C11  | 120.0(2) | C87A | C76A | C75  | 124.6(9)  |
| C21  | C20  | C19  | 122.2(2) | C78  | C77  | C76  | 119.4(8)  |
| C20  | C21  | C22  | 120.9(2) | C78A | C77A | C76A | 123.7(14) |
| C9   | C22  | C1   | 121.4(2) | C77  | C78  | C79  | 122.7(8)  |
| C21  | C22  | C1   | 119.3(2) | C77A | C78A | C79A | 125.5(13) |
| C21  | C22  | C9   | 119.2(2) | C78  | C79  | C88  | 118.1(7)  |
| C12  | C23  | C24  | 124.9(2) | C80  | C79  | C78  | 123.6(8)  |
| C12  | C23  | C40  | 123.0(3) | C80  | C79  | C88  | 118.0(8)  |
| C24  | C23  | C40  | 112.0(2) | C78A | C79A | C88A | 115.4(12) |
| C25  | C24  | C23  | 118.0(3) | C80A | C79A | C78A | 127.0(13) |
| C25  | C24  | C37  | 119.4(3) | C80A | C79A | C88A | 117.3(15) |
| C37  | C24  | C23  | 122.2(3) | C79  | C80  | C81  | 124.0(9)  |
| C24  | C25  | C26  | 120.7(3) | C79A | C80A | C81A | 124.2(16) |
| C27  | C26  | C25  | 122.0(3) | C80  | C81  | C82  | 118.4(8)  |
| C26  | C27  | C28  | 123.1(3) | C80A | C81A | C82A | 121.0(15) |
| C26  | C27  | C38  | 118.1(3) | C81  | C82  | C83  | 119.6(8)  |
| C38  | C27  | C28  | 118.8(3) | C81A | C82A | C83A | 115.2(15) |
| C29  | C28  | C27  | 120.7(3) | C82  | C83  | C84  | 119.6(8)  |
| C28  | C29  | C30  | 122.3(3) | C88  | C83  | C82  | 119.9(7)  |
| C31  | C30  | C29  | 122.4(3) | C88  | C83  | C84  | 119.9(7)  |
| C31  | C30  | C39  | 119.6(3) | C82A | C83A | C84A | 119.7(14) |
| C39  | C30  | C29  | 118.0(3) | C88A | C83A | C82A | 122.5(12) |
| C32  | C31  | C30  | 121.1(3) | C88A | C83A | C84A | 117.4(11) |
| C31  | C32  | C33  | 119.6(3) | C85  | C84  | C83  | 120.7(9)  |
| C34  | C33  | C32  | 121.4(4) | C85A | C84A | C83A | 117.5(14) |
| C33  | C34  | C35  | 122.1(3) | C84  | C85  | C86  | 120.3(9)  |
| C33  | C34  | C39  | 119.1(3) | C84A | C85A | C86  | 126.7(14) |
| C39  | C34  | C35  | 118.7(3) | C73  | C86  | C85  | 124.7(6)  |
| C36  | C35  | C34  | 120.9(3) | C73  | C86  | C85A | 121.5(7)  |
| C35  | C36  | C37  | 122.0(3) | C73  | C86  | C87  | 115.0(4)  |
| C24  | C37  | C36  | 122.7(3) | C73  | C86  | C87A | 126.2(7)  |
| C24  | C37  | C38  | 119.6(3) | C85  | C86  | C87  | 120.3(7)  |
| C38  | C37  | C36  | 117.7(3) | C87A | C86  | C85A | 112.2(10) |
| C37  | C38  | C27  | 120.1(3) | C76  | C87  | C86  | 123.6(7)  |
| C37  | C38  | C39  | 120.3(3) | C88  | C87  | C76  | 118.8(7)  |
| C39  | C38  | C27  | 119.6(3) | C88  | C87  | C86  | 117.6(7)  |
| C30  | C39  | C38  | 120.6(3) | C86  | C87A | C76A | 111.2(10) |
| C34  | C39  | C30  | 119.2(3) | C88A | C87A | C76A | 126.7(10) |
| C34  | C39  | C38  | 120.2(3) | C88A | C87A | C86  | 122.1(10) |
| C41  | C40  | C23  | 118.9(3) | C83  | C88  | C79  | 119.9(7)  |

| Atom | Atom | Atom | Angle/°   | Atom             | Atom | Atom             | Angle/°    |
|------|------|------|-----------|------------------|------|------------------|------------|
| C41  | C40  | C53  | 119.0 (3) | C83              | C88  | C87              | 120.7 (7)  |
| C53  | C40  | C23  | 122.0 (3) | C87              | C88  | C79              | 119.1 (7)  |
| C42  | C41  | C40  | 122.8 (3) | C83A             | C88A | C79A             | 119.2 (12) |
| C41  | C42  | C43  | 119.6 (3) | C83A             | C88A | C87A             | 123.1 (11) |
| C42  | C43  | C44  | 122.0 (4) | C87A             | C88A | C79A             | 117.4 (12) |
| C42  | C43  | C54  | 119.1 (3) | C105             | O3   | C102             | 103.3 (8)  |
| C54  | C43  | C44  | 118.8 (4) | C103             | C102 | O3               | 103.8 (8)  |
| C45  | C44  | C43  | 120.8 (4) | C102             | C103 | C104             | 106.5 (8)  |
| C44  | C45  | C46  | 122.4 (3) | C105             | C104 | C103             | 104.9 (7)  |
| C45  | C46  | C55  | 118.8 (4) | C104             | C105 | O3               | 110.5 (7)  |
| C47  | C46  | C45  | 123.3 (4) | C110             | O4   | C107             | 104.2 (6)  |
| C47  | C46  | C55  | 117.9 (4) | C108             | C107 | O4               | 106.6 (5)  |
| C48  | C47  | C46  | 121.8 (4) | C107             | C108 | C109             | 101.7 (7)  |
| C47  | C48  | C49  | 121.2 (4) | C110             | C109 | C108             | 105.3 (8)  |
| C48  | C49  | C50  | 119.3 (5) | C109             | C110 | O4               | 102.7 (7)  |
| C49  | C50  | C51  | 121.5 (4) | C14              | C111 | C13              | 109.6 (12) |
| C49  | C50  | C55  | 119.6 (3) | C12              | C106 | C11              | 106.8 (13) |
| C55  | C50  | C51  | 118.9 (3) | C16              | C118 | C15              | 112.3 (15) |
| C52  | C51  | C50  | 120.8 (4) | C89              | C90  | C91              | 119.2 (5)  |
| C51  | C52  | C53  | 122.2 (3) | C91 <sup>1</sup> | C91  | C90              | 121.5 (6)  |
| C40  | C53  | C52  | 123.3 (3) | C92 <sup>2</sup> | C92  | C94              | 126.2 (9)  |
| C40  | C53  | C54  | 119.0 (3) | C93              | C92  | C92 <sup>2</sup> | 140.6 (11) |
| C54  | C53  | C52  | 117.7 (3) | C92              | C93  | C95              | 125.6 (13) |
| C43  | C54  | C53  | 120.4 (3) | C92              | C94  | C95              | 112.7 (9)  |
| C55  | C54  | C43  | 119.6 (3) | C98              | C97  | C96              | 117.1 (12) |
| C55  | C54  | C53  | 120.0 (3) | C97              | C98  | C99              | 122.8 (10) |
| C50  | C55  | C46  | 120.1 (4) | C100             | C99  | C98              | 119.6 (11) |
| C50  | C55  | C54  | 120.4 (3) | C99              | C100 | C101             | 120.9 (12) |
| C54  | C55  | C46  | 119.5 (4) | C112             | C113 | C114             | 110.0 (17) |
| C19  | C56  | C57  | 126.2 (2) | C113             | C114 | C115             | 105.8 (16) |
| C19  | C56  | C73  | 122.6 (2) | C116             | C115 | C114             | 107.3 (15) |
| C73  | C56  | C57  | 111.0 (2) | C117             | C116 | C115             | 102.8 (15) |
| C58  | C57  | C56  | 117.3 (3) |                  |      |                  |            |

<sup>1</sup>-X,1-Y,-Z; <sup>2</sup>1-X,2-Y,-Z

**Table S-10.** Selected Torsion Angles

| <b>A</b> | <b>B</b> | <b>C</b> | <b>D</b> | <b>Angle/°</b> | <b>A</b> | <b>B</b> | <b>C</b> | <b>D</b> | <b>Angle/°</b> |
|----------|----------|----------|----------|----------------|----------|----------|----------|----------|----------------|
| O1       | C1       | C2       | C3       | -2.0 (4)       | C51      | C52      | C53      | C54      | 0.0 (5)        |
| O1       | C1       | C2       | C7       | 178.2 (3)      | C52      | C53      | C54      | C43      | 179.4 (3)      |
| O1       | C1       | C22      | C9       | -178.0 (3)     | C52      | C53      | C54      | C55      | 0.6 (5)        |
| O1       | C1       | C22      | C21      | 1.2 (4)        | C53      | C40      | C41      | C42      | -3.6 (5)       |
| O2       | C8       | C9       | C10      | -1.8 (4)       | C53      | C54      | C55      | C46      | 180.0 (3)      |
| O2       | C8       | C9       | C22      | 174.9 (3)      | C53      | C54      | C55      | C50      | -0.1 (5)       |
| C1       | C2       | C3       | C4       | -179.1 (3)     | C54      | C43      | C44      | C45      | 2.1 (6)        |
| C1       | C2       | C7       | C6       | -179.9 (3)     | C55      | C46      | C47      | C48      | -1.3 (7)       |
| C1       | C2       | C7       | C8       | -1.1 (4)       | C55      | C50      | C51      | C52      | 1.5 (6)        |
| C2       | C1       | C22      | C9       | 3.8 (4)        | C56      | C19      | C20      | C11      | -135.0 (3)     |
| C2       | C1       | C22      | C21      | -176.9 (2)     | C56      | C19      | C20      | C21      | 46.0 (4)       |
| C2       | C3       | C4       | C5       | -0.7 (5)       | C56      | C57      | C58      | C59      | -171.0 (3)     |
| C2       | C7       | C8       | O2       | -174.7 (3)     | C56      | C57      | C70      | C69      | -10.7 (4)      |
| C2       | C7       | C8       | C9       | 5.7 (4)        | C56      | C57      | C70      | C71      | 168.6 (2)      |
| C3       | C2       | C7       | C6       | 0.3 (4)        | C56      | C73      | C74      | C75      | 177.7 (3)      |
| C3       | C2       | C7       | C8       | 179.1 (3)      | C56      | C73      | C86      | C85      | -0.4 (10)      |
| C3       | C4       | C5       | C6       | -0.3 (5)       | C56      | C73      | C86      | C85A     | 3.8 (10)       |
| C4       | C5       | C6       | C7       | 1.3 (5)        | C56      | C73      | C86      | C87      | -178.2 (9)     |
| C5       | C6       | C7       | C2       | -1.3 (4)       | C56      | C73      | C86      | C87A     | -179.1 (13)    |
| C5       | C6       | C7       | C8       | 179.9 (3)      | C57      | C56      | C73      | C74      | 71.7 (3)       |
| C6       | C7       | C8       | O2       | 4.1 (4)        | C57      | C56      | C73      | C86      | -107.0 (3)     |
| C6       | C7       | C8       | C9       | -175.5 (2)     | C57      | C58      | C59      | C60      | 2.8 (5)        |
| C7       | C2       | C3       | C4       | 0.7 (5)        | C57      | C70      | C71      | C60      | 0.9 (4)        |
| C7       | C8       | C9       | C10      | 177.7 (2)      | C57      | C70      | C71      | C72      | -177.5 (3)     |
| C7       | C8       | C9       | C22      | -5.5 (4)       | C58      | C57      | C70      | C69      | 179.8 (3)      |
| C8       | C9       | C10      | C11      | 178.3 (2)      | C58      | C57      | C70      | C71      | -0.9 (4)       |
| C8       | C9       | C22      | C1       | 0.8 (4)        | C58      | C59      | C60      | C61      | 176.3 (3)      |
| C8       | C9       | C22      | C21      | -178.5 (2)     | C58      | C59      | C60      | C71      | -2.8 (5)       |
| C9       | C10      | C11      | C12      | -174.8 (3)     | C59      | C60      | C61      | C62      | -179.0 (3)     |
| C9       | C10      | C11      | C20      | 1.2 (4)        | C59      | C60      | C71      | C70      | 0.9 (4)        |
| C10      | C9       | C22      | C1       | 177.5 (2)      | C59      | C60      | C71      | C72      | 179.3 (3)      |
| C10      | C9       | C22      | C21      | -1.8 (4)       | C60      | C61      | C62      | C63      | 0.3 (6)        |
| C10      | C11      | C12      | C13      | 140.7 (3)      | C60      | C71      | C72      | C63      | -1.0 (4)       |
| C10      | C11      | C12      | C23      | -41.9 (4)      | C60      | C71      | C72      | C67      | 179.5 (3)      |
| C10      | C11      | C20      | C19      | 177.3 (2)      | C61      | C60      | C71      | C70      | -178.1 (3)     |
| C10      | C11      | C20      | C21      | -3.6 (4)       | C61      | C60      | C71      | C72      | 0.3 (4)        |
| C11      | C12      | C13      | C14      | -135.5 (3)     | C61      | C62      | C63      | C64      | -179.9 (4)     |
| C11      | C12      | C13      | C18      | 41.7 (3)       | C61      | C62      | C63      | C72      | -1.0 (6)       |
| C11      | C12      | C23      | C24      | -1.6 (5)       | C62      | C63      | C64      | C65      | 179.1 (4)      |



| A   | B   | C   | D   | Angle/°    | A   | B   | C    | D    | Angle/°     |
|-----|-----|-----|-----|------------|-----|-----|------|------|-------------|
| C11 | C12 | C23 | C40 | -176.2 (3) | C62 | C63 | C72  | C67  | -179.2 (3)  |
| C11 | C20 | C21 | C22 | 3.4 (4)    | C62 | C63 | C72  | C71  | 1.3 (5)     |
| C12 | C11 | C20 | C19 | -6.4 (4)   | C63 | C64 | C65  | C66  | -0.5 (7)    |
| C12 | C11 | C20 | C21 | 172.7 (2)  | C64 | C63 | C72  | C67  | -0.2 (5)    |
| C12 | C13 | C14 | C15 | 177.9 (2)  | C64 | C63 | C72  | C71  | -179.7 (3)  |
| C12 | C13 | C18 | C17 | 180.0 (2)  | C64 | C65 | C66  | C67  | 0.8 (6)     |
| C12 | C13 | C18 | C19 | -4.8 (3)   | C65 | C66 | C67  | C68  | 178.6 (3)   |
| C12 | C23 | C24 | C25 | -92.8 (4)  | C65 | C66 | C67  | C72  | -0.9 (6)    |
| C12 | C23 | C24 | C37 | 94.1 (4)   | C66 | C67 | C68  | C69  | -178.3 (3)  |
| C12 | C23 | C40 | C41 | -118.6 (4) | C66 | C67 | C72  | C63  | 0.6 (5)     |
| C12 | C23 | C40 | C53 | 65.2 (4)   | C66 | C67 | C72  | C71  | -179.9 (3)  |
| C13 | C12 | C23 | C24 | 175.5 (3)  | C67 | C68 | C69  | C70  | -1.5 (5)    |
| C13 | C12 | C23 | C40 | 1.0 (5)    | C68 | C67 | C72  | C63  | -178.9 (3)  |
| C13 | C14 | C15 | C16 | 1.4 (4)    | C68 | C67 | C72  | C71  | 0.6 (5)     |
| C13 | C18 | C19 | C20 | -37.1 (3)  | C68 | C69 | C70  | C57  | 179.2 (3)   |
| C13 | C18 | C19 | C56 | 141.1 (3)  | C68 | C69 | C70  | C71  | 0.0 (4)     |
| C14 | C13 | C18 | C17 | -2.7 (4)   | C69 | C70 | C71  | C60  | -179.8 (3)  |
| C14 | C13 | C18 | C19 | 172.4 (2)  | C69 | C70 | C71  | C72  | 1.7 (4)     |
| C14 | C15 | C16 | C17 | -1.6 (4)   | C70 | C57 | C58  | C59  | -0.9 (4)    |
| C15 | C16 | C17 | C18 | -0.5 (4)   | C70 | C71 | C72  | C63  | 177.4 (3)   |
| C16 | C17 | C18 | C13 | 2.7 (4)    | C70 | C71 | C72  | C67  | -2.1 (4)    |
| C16 | C17 | C18 | C19 | -172.2 (3) | C71 | C60 | C61  | C62  | 0.0 (5)     |
| C17 | C18 | C19 | C20 | 137.9 (3)  | C72 | C63 | C64  | C65  | 0.2 (6)     |
| C17 | C18 | C19 | C56 | -44.0 (4)  | C72 | C67 | C68  | C69  | 1.1 (5)     |
| C18 | C13 | C14 | C15 | 0.7 (4)    | C73 | C56 | C57  | C58  | 80.5 (3)    |
| C18 | C19 | C20 | C11 | 43.3 (3)   | C73 | C56 | C57  | C70  | -89.2 (3)   |
| C18 | C19 | C20 | C21 | -135.8 (3) | C73 | C74 | C75  | C76  | 1.7 (13)    |
| C18 | C19 | C56 | C57 | -4.3 (5)   | C73 | C74 | C75  | C76A | 2.1 (12)    |
| C18 | C19 | C56 | C73 | -178.6 (3) | C73 | C86 | C87  | C76  | -1 (2)      |
| C19 | C20 | C21 | C22 | -177.6 (2) | C73 | C86 | C87  | C88  | 178.3 (12)  |
| C19 | C56 | C57 | C58 | -94.4 (4)  | C73 | C86 | C87A | C76A | 1 (2)       |
| C19 | C56 | C57 | C70 | 96.0 (3)   | C73 | C86 | C87A | C88A | -177.4 (17) |
| C19 | C56 | C73 | C74 | -113.2 (3) | C74 | C73 | C86  | C85  | -179.1 (9)  |
| C19 | C56 | C73 | C86 | 68.1 (4)   | C74 | C73 | C86  | C85A | -174.9 (10) |
| C20 | C11 | C12 | C13 | -35.4 (3)  | C74 | C73 | C86  | C87  | 3.1 (10)    |
| C20 | C11 | C12 | C23 | 142.1 (3)  | C74 | C73 | C86  | C87A | 2.2 (14)    |
| C20 | C19 | C56 | C57 | 173.7 (3)  | C74 | C75 | C76  | C77  | -179.9 (15) |
| C20 | C19 | C56 | C73 | -0.6 (4)   | C74 | C75 | C76  | C87  | 0 (2)       |
| C20 | C21 | C22 | C1  | -180.0 (2) | C74 | C75 | C76A | C77A | -177.3 (18) |
| C20 | C21 | C22 | C9  | -0.7 (4)   | C74 | C75 | C76A | C87A | 1 (3)       |
| C22 | C1  | C2  | C3  | 176.1 (3)  | C75 | C76 | C77  | C78  | 177.2 (18)  |

| A   | B   | C   | D   | Angle/°    | A    | B    | C    | D    | Angle/°     |
|-----|-----|-----|-----|------------|------|------|------|------|-------------|
| C22 | C1  | C2  | C7  | -3.6 (4)   | C75  | C76  | C87  | C86  | -1 (3)      |
| C22 | C9  | C10 | C11 | 1.5 (4)    | C75  | C76  | C87  | C88  | 179.9 (16)  |
| C23 | C12 | C13 | C14 | 47.0 (4)   | C75  | C76A | C77A | C78A | -177 (2)    |
| C23 | C12 | C13 | C18 | -135.8 (3) | C75  | C76A | C87A | C86  | -2 (3)      |
| C23 | C24 | C25 | C26 | -173.6 (3) | C75  | C76A | C87A | C88A | 176 (2)     |
| C23 | C24 | C37 | C36 | -9.1 (4)   | C76  | C77  | C78  | C79  | 8 (3)       |
| C23 | C24 | C37 | C38 | 171.8 (2)  | C76  | C87  | C88  | C79  | -2 (3)      |
| C23 | C40 | C41 | C42 | -179.9 (3) | C76  | C87  | C88  | C83  | -177 (2)    |
| C23 | C40 | C53 | C52 | -0.2 (5)   | C76A | C77A | C78A | C79A | -6 (4)      |
| C23 | C40 | C53 | C54 | 178.3 (3)  | C76A | C87A | C88A | C79A | 7 (4)       |
| C24 | C23 | C40 | C41 | 66.3 (4)   | C76A | C87A | C88A | C83A | -179 (3)    |
| C24 | C23 | C40 | C53 | -109.9 (3) | C77  | C76  | C87  | C86  | 179.7 (18)  |
| C24 | C25 | C26 | C27 | 1.7 (5)    | C77  | C76  | C87  | C88  | 0 (3)       |
| C24 | C37 | C38 | C27 | 1.5 (4)    | C77  | C78  | C79  | C80  | 176.9 (19)  |
| C24 | C37 | C38 | C39 | -177.6 (2) | C77  | C78  | C79  | C88  | -10 (3)     |
| C25 | C24 | C37 | C36 | 177.9 (3)  | C77A | C76A | C87A | C86  | 176.3 (19)  |
| C25 | C24 | C37 | C38 | -1.3 (4)   | C77A | C76A | C87A | C88A | -6 (4)      |
| C25 | C26 | C27 | C28 | 177.1 (3)  | C77A | C78A | C79A | C80A | 179 (3)     |
| C25 | C26 | C27 | C38 | -1.5 (4)   | C77A | C78A | C79A | C88A | 6 (4)       |
| C26 | C27 | C28 | C29 | -178.1 (3) | C78  | C79  | C80  | C81  | 174 (2)     |
| C26 | C27 | C38 | C37 | -0.1 (4)   | C78  | C79  | C88  | C83  | -178.6 (19) |
| C26 | C27 | C38 | C39 | 179.0 (3)  | C78  | C79  | C88  | C87  | 7 (3)       |
| C27 | C28 | C29 | C30 | 0.0 (5)    | C78A | C79A | C80A | C81A | -179 (3)    |
| C27 | C38 | C39 | C30 | -1.6 (4)   | C78A | C79A | C88A | C83A | 180 (3)     |
| C27 | C38 | C39 | C34 | 178.3 (3)  | C78A | C79A | C88A | C87A | -6 (4)      |
| C28 | C27 | C38 | C37 | -178.8 (2) | C79  | C80  | C81  | C82  | 1 (3)       |
| C28 | C27 | C38 | C39 | 0.4 (4)    | C79A | C80A | C81A | C82A | 6 (5)       |
| C28 | C29 | C30 | C31 | 179.6 (3)  | C80  | C79  | C88  | C83  | -5 (3)      |
| C28 | C29 | C30 | C39 | -1.2 (5)   | C80  | C79  | C88  | C87  | -179.8 (18) |
| C29 | C30 | C31 | C32 | 177.8 (3)  | C80  | C81  | C82  | C83  | 0 (3)       |
| C29 | C30 | C39 | C34 | -177.9 (3) | C80A | C79A | C88A | C83A | 6 (4)       |
| C29 | C30 | C39 | C38 | 2.0 (4)    | C80A | C79A | C88A | C87A | 180 (2)     |
| C30 | C31 | C32 | C33 | 0.6 (5)    | C80A | C81A | C82A | C83A | -7 (4)      |
| C31 | C30 | C39 | C34 | 1.3 (4)    | C81  | C82  | C83  | C84  | -175.2 (18) |
| C31 | C30 | C39 | C38 | -178.8 (3) | C81  | C82  | C83  | C88  | -4 (3)      |
| C31 | C32 | C33 | C34 | 0.4 (5)    | C81A | C82A | C83A | C84A | 179 (3)     |
| C32 | C33 | C34 | C35 | 178.8 (3)  | C81A | C82A | C83A | C88A | 7 (4)       |
| C32 | C33 | C34 | C39 | -0.5 (5)   | C82  | C83  | C84  | C85  | 179.0 (18)  |
| C33 | C34 | C35 | C36 | -178.1 (3) | C82  | C83  | C88  | C79  | 7 (3)       |
| C33 | C34 | C39 | C30 | -0.4 (4)   | C82  | C83  | C88  | C87  | -179.1 (18) |
| C33 | C34 | C39 | C38 | 179.7 (3)  | C82A | C83A | C84A | C85A | 176 (3)     |

| A   | B   | C   | D   | Angle/°    | A                | B    | C    | D                | Angle/°     |
|-----|-----|-----|-----|------------|------------------|------|------|------------------|-------------|
| C34 | C35 | C36 | C37 | -0.6 (4)   | C82A             | C83A | C88A | C79A             | -7 (5)      |
| C35 | C34 | C39 | C30 | -179.7 (3) | C82A             | C83A | C88A | C87A             | 179 (3)     |
| C35 | C34 | C39 | C38 | 0.4 (4)    | C83              | C84  | C85  | C86              | -3 (3)      |
| C35 | C36 | C37 | C24 | 179.2 (3)  | C83A             | C84A | C85A | C86              | 11 (4)      |
| C35 | C36 | C37 | C38 | -1.6 (4)   | C84              | C83  | C88  | C79              | 177.9 (16)  |
| C36 | C37 | C38 | C27 | -177.8 (2) | C84              | C83  | C88  | C87              | -8 (3)      |
| C36 | C37 | C38 | C39 | 3.1 (4)    | C84              | C85  | C86  | C73              | -178.3 (12) |
| C37 | C24 | C25 | C26 | -0.3 (4)   | C84              | C85  | C86  | C87              | -1 (2)      |
| C37 | C38 | C39 | C30 | 177.5 (2)  | C84A             | C83A | C88A | C79A             | -179 (2)    |
| C37 | C38 | C39 | C34 | -2.6 (4)   | C84A             | C83A | C88A | C87A             | 7 (5)       |
| C38 | C27 | C28 | C29 | 0.4 (4)    | C84A             | C85A | C86  | C73              | 173 (2)     |
| C39 | C30 | C31 | C32 | -1.4 (5)   | C84A             | C85A | C86  | C87A             | -5 (3)      |
| C39 | C34 | C35 | C36 | 1.2 (4)    | C85              | C86  | C87  | C76              | -179.1 (17) |
| C40 | C23 | C24 | C25 | 82.3 (3)   | C85              | C86  | C87  | C88              | 0 (2)       |
| C40 | C23 | C24 | C37 | -90.9 (3)  | C85A             | C86  | C87A | C76A             | 177.8 (17)  |
| C40 | C41 | C42 | C43 | 1.9 (6)    | C85A             | C86  | C87A | C88A             | 0 (3)       |
| C40 | C53 | C54 | C43 | 0.8 (5)    | C86              | C73  | C74  | C75              | -3.6 (5)    |
| C40 | C53 | C54 | C55 | -178.0 (3) | C86              | C87  | C88  | C79              | 178.2 (14)  |
| C41 | C40 | C53 | C52 | -176.4 (3) | C86              | C87  | C88  | C83              | 4 (3)       |
| C41 | C40 | C53 | C54 | 2.1 (5)    | C86              | C87A | C88A | C79A             | -176 (2)    |
| C41 | C42 | C43 | C44 | 179.7 (4)  | C86              | C87A | C88A | C83A             | -2 (4)      |
| C41 | C42 | C43 | C54 | 1.2 (6)    | C87              | C76  | C77  | C78              | -3 (3)      |
| C42 | C43 | C44 | C45 | -176.4 (4) | C87A             | C76A | C77A | C78A             | 5 (3)       |
| C42 | C43 | C54 | C53 | -2.5 (5)   | C88              | C79  | C80  | C81              | 2 (3)       |
| C42 | C43 | C54 | C55 | 176.3 (3)  | C88              | C83  | C84  | C85              | 8 (3)       |
| C43 | C44 | C45 | C46 | -0.8 (7)   | C88A             | C79A | C80A | C81A             | -6 (4)      |
| C43 | C54 | C55 | C46 | 1.1 (5)    | C88A             | C83A | C84A | C85A             | -11 (4)     |
| C43 | C54 | C55 | C50 | -178.9 (3) | O3               | C102 | C103 | C104             | 33.2 (15)   |
| C44 | C43 | C54 | C53 | 178.9 (3)  | C102             | O3   | C105 | C104             | 17.4 (10)   |
| C44 | C43 | C54 | C55 | -2.2 (5)   | C102             | C103 | C104 | C105             | -22.4 (15)  |
| C44 | C45 | C46 | C47 | 179.3 (4)  | C103             | C104 | C105 | O3               | 2.7 (13)    |
| C44 | C45 | C46 | C55 | -0.3 (6)   | C105             | O3   | C102 | C103             | -30.4 (11)  |
| C45 | C46 | C47 | C48 | 179.0 (5)  | O4               | C107 | C108 | C109             | 29.6 (10)   |
| C45 | C46 | C55 | C50 | -179.8 (4) | C13 <sup>1</sup> | C13  | C111 | C14              | -174.8 (17) |
| C45 | C46 | C55 | C54 | 0.1 (5)    | C107             | O4   | C110 | C109             | -21.2 (10)  |
| C46 | C47 | C48 | C49 | 1.8 (8)    | C107             | C108 | C109 | C110             | -44.7 (12)  |
| C47 | C46 | C55 | C50 | 0.5 (6)    | C108             | C109 | C110 | O4               | 40.7 (12)   |
| C47 | C46 | C55 | C54 | -179.5 (4) | C110             | O4   | C107 | C108             | -5.8 (9)    |
| C47 | C48 | C49 | C50 | -1.4 (7)   | C89              | C90  | C91  | C91 <sup>2</sup> | -176.1 (7)  |
| C48 | C49 | C50 | C51 | -178.6 (4) | C92 <sup>3</sup> | C92  | C93  | C95              | -149.7 (14) |
| C48 | C49 | C50 | C55 | 0.6 (6)    | C92 <sup>3</sup> | C92  | C94  | C95              | 170.4 (9)   |

| <b>A</b> | <b>B</b> | <b>C</b> | <b>D</b> | <b>Angle/°</b> | <b>A</b> | <b>B</b> | <b>C</b> | <b>D</b> | <b>Angle/°</b> |
|----------|----------|----------|----------|----------------|----------|----------|----------|----------|----------------|
| C49      | C50      | C51      | C52      | -179.3 (4)     | C96      | C97      | C98      | C99      | -178.4 (8)     |
| C49      | C50      | C55      | C46      | -0.2 (6)       | C97      | C98      | C99      | C100     | 177.8 (10)     |
| C49      | C50      | C55      | C54      | 179.9 (4)      | C98      | C99      | C100     | C101     | -163.3 (11)    |
| C50      | C51      | C52      | C53      | -1.0 (5)       | C112     | C113     | C114     | C115     | 164 (3)        |
| C51      | C50      | C55      | C46      | 179.0 (3)      | C113     | C114     | C115     | C116     | 177 (2)        |
| C51      | C50      | C55      | C54      | -1.0 (5)       | C114     | C115     | C116     | C117     | 169 (2)        |
| C51      | C52      | C53      | C40      | 178.5 (3)      |          |          |          |          |                |

<sup>1</sup>2-X,2-Y,1-Z; <sup>2</sup>X,1-Y,-Z; <sup>3</sup>1-X,2-Y,-Z
